1  
2  
3  
4  
5  
6  
7  
8  
9  
10  
11  
12  
13  
14  
15  
16  
17  
18  
19  
20  
21  
22  
23  
24  
25  
26  
27  
28  
29

## The cAMP effector PKA mediates Moody GPCR signaling in *Drosophila* blood-brain barrier formation and maturation

Xiaoling Li<sup>1,2,3,\*</sup>, Richard Fetter<sup>4</sup>, Tina Schwabe<sup>2,\*</sup>, Christophe Jung<sup>2</sup>, Hermann Steller<sup>3,\*</sup>, and Ulrike Gaul<sup>2,3</sup>

<sup>1</sup>Tianjin Cancer Hospital Airport Hospital, Tianjin Medical University Cancer Institute & Hospital, 99 East Fifth Avenue, Tianjin 300308, China

<sup>2</sup>Department of Biochemistry, Gene Center, Center of Integrated Protein Science (CIPSM), University of Munich, Feodor-Lynen-Str. 25, Munich 81377, Germany

<sup>3</sup>Rockefeller University, 1230 York Ave, New York, NY 10065-6399, USA

<sup>4</sup>Janelia Farm Research Campus, Howard Hughes Medical Institute, Ashburn, VA 20147, USA

\*Current address: Alector Pharmaceuticals LLC, 953 Indiana Street, San Francisco, CA 94107

\* Corresponding authors:

Xiaoling Li, Email: [lixiaoling@tmu.edu.cn](mailto:lixiaoling@tmu.edu.cn), Phone: +86-22-60177622

Hermann Steller, Email: [steller@rockefeller.edu](mailto:steller@rockefeller.edu), Phone: 212-327-7075

### Key words:

Blood-Brain Barrier, GPCR signaling, PKA, apical-basal polarity, septate junction, epithelium development

## 30 Abstract

31 The blood-brain barrier (BBB) of *Drosophila* is comprised of a thin epithelial layer of  
32 subperineural glia (SPG), which ensheath the nerve cord and insulate it against the  
33 potassium-rich hemolymph by forming intercellular septate junctions (SJs). Previously,  
34 we identified a novel Gi/Go protein-coupled receptor (GPCR), Moody, as a key factor in  
35 BBB formation at the embryonic stage. However, the molecular and cellular  
36 mechanisms of Moody signaling in BBB formation and maturation remain unclear. Here,  
37 we identify cAMP-dependent protein kinase A (PKA) as a crucial antagonistic Moody  
38 effector that is required for the formation, as well as for the continued SPG growth and  
39 BBB maintenance in the larva and adult stage. We show that PKA is enriched at the  
40 basal side of the SPG cell and that this polarized Moody/PKA pathway finely tunes the  
41 enormous cell growth and BBB integrity, by precisely regulating the actomyosin  
42 contractility, vesicle trafficking, and the proper SJ organization in a highly coordinated  
43 spatiotemporal manner. These effects are mediated in part by PKA's molecular targets  
44 MLCK and Rho1. Moreover, 3D reconstruction of SJ ultrastructure demonstrates that  
45 the continuity of individual SJ segments and not their total length is crucial for  
46 generating a proper paracellular seal. Based on these findings, we propose a model  
47 that polarized Moody/PKA signaling plays a central role in controlling the cell growth  
48 and maintaining BBB integrity during the continuous morphogenesis of the SPG  
49 secondary epithelium, which is critical for maintain tissue size and brain homeostasis  
50 during organogenesis.

51

52

## 53 Introduction

54 The blood-brain barrier (BBB) is a complex physical barrier between the nervous  
55 system and the peripheral circulatory system that regulate CNS homeostasis to ensure  
56 proper neuronal function. The *Drosophila* BBB is established by a thin epithelium of  
57 subperineural glia (SPG), which ensheath and insulate the nervous system against the  
58 potassium-rich hemolymph by forming intercellular septate junctions (SJs) ([Bainton et](#)  
59 [al., 2005](#); [Carlson et al., 2000](#); [Edwards et al., 1993](#)). The SPG epithelium is formed as  
60 a result of a mesenchymal-epithelial transition (MET), similar to other secondary  
61 epithelia such as heart and midgut. SPG cells only increase in number in  
62 embryogenesis but not in morphogenesis, and rather increase their size by  
63 polyploidization ([Unhavaithaya and Orr-Weaver, 2012](#)). Polyploidy in SPG is necessary  
64 to coordinate cell growth and BBB integrity either by Notch signaling or miR-285–  
65 Yki/Mask signaling during CNS development at the larval stage ([Li et al., 2017](#);  
66 [Unhavaithaya and Orr-Weaver, 2012](#); [Von Stetina et al., 2018](#)). SPG cells lack the  
67 apical markers present in primary epithelia (Crumbs, Bazooka), they have no  
68 contiguous zonula adherens and therefore rely on their SJ belt for epithelial cohesion  
69 and preventing paracellular diffusion and seal the BBB ([Schwabe et al., 2005](#); [Stork et](#)  
70 [al., 2008](#); [Tepass, 2012](#); [Tepass et al., 2001](#)).

71 SJs are the crucial barrier junctions in invertebrates and functionally equivalent to  
72 vertebrate tight junctions; both junctions share Claudins as key components ([Izumi and](#)  
73 [Furuse, 2014](#)). Structurally and molecularly, SJs are homologous to the vertebrate  
74 paranodal junction (for review see ([Banerjee et al., 2006](#); [Salzer et al., 2008](#))). They  
75 consist of a core mutual interdependence protein complex, including transmembrane  
76 and cytoplasmic proteins, such as Neurexin-IV (Nrx-IV), Neuroglian (Nrg), the Na/K-  
77 ATPase (ATP $\alpha$  and Nrv2), the claudin Megatrachea (Mega), Sinous, Coracle (Cora),  
78 and the tetraspan Pasiflora protein family ([Oshima and Fehon, 2011](#)). In addition to the  
79 above-listed proteins, several GPI-anchored proteins, including Ly6-domain proteins  
80 Boudin, Crooked, Crimped, and Coiled ([Hijazi et al., 2011](#); [Hijazi et al., 2009](#); [Syed et](#)  
81 [al., 2011](#); [Tempesta et al., 2017](#)), Lachesin ([Llimargas et al., 2004](#)), Contactin ([Faivre-](#)  
82 [Sarrailh et al., 2004](#)), the tetraspan Pasiflora protein family([Deligiannaki et al., 2015](#))

83 and Undicht ([Petri et al., 2019](#)), which are all found to be required for the SJ complex  
84 formation and proper membrane trafficking. The intracellular signaling pathways that  
85 control the assembly and maintenance of SJs are just beginning to be elucidated.

86 We have previously identified a novel GPCR signaling pathway that is required for  
87 the proper organization of SJ belts between neighboring SPG at the embryonic stage,  
88 consisting of the receptor Moody, two hetero-trimeric G proteins ( $G_{\alpha i\beta\gamma}$ ,  $G_{\alpha o\beta\gamma}$ ), and  
89 the RGS protein Loco. Both gain and loss of Moody signaling lead to non-synchronized  
90 growth of SPG cells, resulting in disorganized cell-contacts and shortened SJs and  
91 therefore, a leaky BBB ([Schwabe et al., 2005](#); [Schwabe et al., 2017](#)). The phenotype of  
92 Moody is weaker than that of downstream pathway components including Loco and  
93  $G\beta 13F$ , suggesting that additional receptors provide input into the trimeric G protein  
94 signaling pathway.  $G\gamma 1$  signaling has been shown to regulate the proper localization of  
95 SJ proteins in the embryonic heart ([Yi et al., 2008](#)). Despite its critical role in BBB  
96 formation, the underlying mechanisms connecting G protein signaling to continued SPG  
97 cell growth and the proper SJ organization during the development and maturation of  
98 BBB are still poorly understood.

99 One of the principal trimeric G protein effectors is Adenylate Cyclase (AC). AC is  
100 inhibited by the G proteins  $G_{\alpha i/G_{\alpha o}}$  and  $G_{\beta\gamma}$ , leading to decreased levels of the second  
101 messenger cAMP. The prime effector of cAMP, in turn, is cAMP-dependent protein  
102 kinase A (PKA), a serine/threonine kinase. PKA is inactive as a tetrameric holoenzyme,  
103 which consists of two identical catalytic and two regulatory subunits. Binding of cAMP to  
104 the regulatory units releases and activates the catalytic subunits ([Taylor et al., 1990](#)).  
105 PKA transmits the signal to downstream effectors by phosphorylating multiple  
106 substrates which participate in many different processes, from signal transduction to  
107 regulation of cell shape and ion channel conductivity ([Shabb, 2001](#)). In *Drosophila*, PKA  
108 has been studied as a component of GPCR signaling in the Hedgehog pathway during  
109 development ([Li et al., 1995](#); [Marks and Kalderon, 2011](#)), and in neurotransmitter  
110 receptor pathways during learning and memory ([Chen and Ganetzky, 2012](#); [Guan et al.,](#)  
111 [2011](#); [Li et al., 1996](#); [Renger et al., 2000](#)). PKA also regulates microtubule organization  
112 and mRNA localization during oogenesis ([Lane and Kalderon, 1993, 1994, 1995](#)). In

113 vertebrates, cAMP/PKA signaling is known to play a central role within different  
114 subcellular regions, including the regulation of actomyosin contractility and localized cell  
115 protrusion in directional cell migration ([Howe, 2004](#); [Lim et al., 2008](#); [Tkachenko et al.,](#)  
116 [2011](#)); intracellular membrane trafficking (exocytosis, endocytosis and transcytosis) in  
117 relation to the dynamics of epithelial surface domains in developmental processes and  
118 organ function ([Wojtal et al., 2008](#)); and the regulation of endothelial tight junction (TJ)  
119 with diverse actions and unclear mechanisms in different endothelial cells  
120 models([Cong and Kong, 2020](#)).

121 Here, we report results from a comprehensive *in vivo* analysis of the molecular and  
122 cellular mechanisms of Moody signaling in the SPG. We show that PKA is a key  
123 downstream effector responsible for the salient phenotypic outcomes, and that it acts by  
124 modulating actomyosin contractility via MLCK and Rho1. The strong phenotypic effects  
125 of PKA gain- and loss-of-function permit a detailed dissection of the organization of cell-  
126 cell contacts as driven by Moody/PKA signaling and allow us to track its role in the  
127 continued growth of the SPG during larval stages. We observe asymmetric and  
128 opposing subcellular distributions of Moody and PKA, providing novel insight into the  
129 establishment of apical-basal polarity in the SPG as a secondary epithelium, as well as  
130 its morphogenetic function. We present a 3D reconstruction of SJ ultrastructure using  
131 serial section Transmission Electron Microscopy (ssTEM) under different PKA activity  
132 levels. This new analysis reveals a strict coupling of total cell contact and SJ areas, but  
133 also suggests that it is the continuity of individual SJ segments and not total SJ width  
134 that is essential for normal BBB insulation. Altogether, our data reveal a previously  
135 unrecognized role of GPCR/PKA in maintaining enormous SPG cell growth and its  
136 sealing capability by regulating actomyosin contractility and the proper SJ organization  
137 in BBB formation and maturation, which touches the fundamental aspects of remodeling  
138 cytoskeletal network spatiotemporally - a common processes but with different  
139 mechanisms in morphogenesis.

140

141

## 142 Results

### 143 PKA is required for Moody-regulated BBB formation

144 To identify molecules that act downstream of Moody signaling in BBB formation, we  
145 examined genes known to be involved in GPCR signaling, such as PkaC1, PI3K, PTEN,  
146 PLC, and Rap1. We tested BBB permeability in genomic mutants or transgenic RNAi  
147 knockdowns of these GPCR effectors, by injecting a fluorescent dye into the body cavity  
148 and determining its penetration into the CNS using confocal imaging. We found that  
149 zygotic mutants of the PKA catalytic subunit PkaC1 (originally named DC0 in  
150 *Drosophila*), namely the two null alleles *PkaC1<sup>B3</sup>* and *PkaC1<sup>H2</sup>* as well as the  
151 hypomorphic allele *PkaC1<sup>A13</sup>* ([Kalderon and Rubin, 1988](#)) show severe CNS insulation  
152 defects (Figure 1A-B), similar in strength to zygotic mutants of the negative regulator  
153 *loco*. By contrast, the removal of the other candidates had no effect (data not shown).  
154 *PkaC1* has both maternal and zygotic components, and its maternal contribution  
155 perdures until late embryogenesis ([Lane and Kalderon, 1993](#)). The BBB defect we  
156 observe could explain the morphologically inconspicuous embryonic lethality of *PkaC1*  
157 zygotic null mutants ([Lane and Kalderon, 1993](#)). To rule out the possibility that the  
158 observed BBB defects are caused by glial cell fate or migration defects, we examined  
159 the presence and position of SPG using an antibody against the pan-glial, nuclear  
160 protein Reversed polarity (Repo) ([Halter et al., 1995](#)). In *PkaC1* zygotic mutants, the full  
161 set of SPG is present on the surface of the nerve cord, although the position of the  
162 nuclei is more variable than in WT (Figure 1C), an effect that is also observed in known  
163 mutants of the Moody signaling pathway ([Granderath et al., 1999](#); [Schwabe et al., 2005](#)).

164 Since SJs are the principal structure providing BBB insulation and are disrupted in  
165 Moody pathway mutants ([Schwabe et al., 2005](#); [Schwabe et al., 2017](#)), we sought to  
166 characterize the SJ morphology in PkaC1 mutants. We performed ultrastructural  
167 analysis of SJs in late embryos (AEL 22-23h) by Transmission Electron Microscopy  
168 (TEM) using high pressure freezing fixation. In WT, the SJs are extended, well-  
169 organized structures that retain orientation in the same plane over long distances  
170 (Figure 1D). In contrast, in *PkaC1<sup>H2</sup>* zygotic mutants, the overall organization of SJs  
171 appears perturbed, and their length, as measured in random single sections, is

172 significantly shorter than in WT (Figure 1D-E); very similar phenotypic defects are  
173 observed in *moody* and *loco* zygotic mutants ([Schwabe et al., 2005](#)).

174 To explore the role of PkaC1 during development of the BBB, we performed time-  
175 lapse recordings of SPG epithelium formation. The SPG arise in the ventro-lateral  
176 neuroectoderm and migrate to the surface of the developing nerve cord ([Ito et al., 1995](#)),  
177 where they spread until they reach their neighbors and form intercellular SJs ([Schwabe](#)  
178 [et al., 2005](#); [Schwabe et al., 2017](#)). To monitor the changes in SPG morphology during  
179 the closure process, we expressed the membrane marker *GapGFP* and the actin  
180 marker *MoesinGFP* using the pan-glial driver *repoGAL4* ([Schwabe et al., 2017](#)) (Figure  
181 1F, movies S1 and S2). In WT embryos, SPG are relatively uniform in cell size and  
182 shape, and grow to form cell-cell contacts in a highly synchronized manner. By 15.5 h of  
183 development, the glial sheet is closed (Figure 1F). By contrast, SPG in *PkaC1<sup>H2</sup>* zygotic  
184 mutants show increased variability in size and shape, and their spreading and contact  
185 formation is less well coordinated. This results in patchy cell-cell contacts with gaps of  
186 variable sizes (Figure 1F). Moreover, the complete closure of the SPG epithelium is  
187 delayed compared to WT (Figure 1F). Again, the defects observed in PKA loss-of-  
188 function are similar to those in Moody pathway mutants ([Schwabe et al., 2017](#)).

189 Our results show that *PkaC1* is required for BBB integrity, proper SJ organization,  
190 and SPG epithelium formation, in all cases closely mimicking the phenotypes observed  
191 for known Moody signaling components. Given these similarities, we sought to  
192 determine whether PKA participates in the Moody pathway by performing dominant  
193 genetic interaction experiments. Notably, we found that embryos heterozygous for  
194 *PkaC1* null alleles, which are known to have ~50% of wild type PkaC1 activity, show  
195 mild BBB permeability defects (Figure 1G). Therefore, we used *PkaC1<sup>B3</sup>* heterozygous  
196 mutants as a sensitized genetic background and removed one genomic copy of different  
197 Moody pathway components, including Moody, Loco, Gao, Gai, and G $\beta$ 13F ([Schwabe](#)  
198 [et al., 2005](#)), to determine whether any synergistic or antagonistic interactions are  
199 observed. We found that the dye penetration defects of *PkaC1* heterozygous mutants  
200 are significantly reduced by removing one genomic copy of *G $\beta$ 13F* or *loco* (Figure 1G  
201 and S1); removal of one genomic copy of *G $\beta$ 13F* or *loco* on their own have no effect.



202 These genetic interactions indicate that PkaC1 is indeed part of the Moody signaling  
203 pathway. Removal of single copies of other pathway components showed either a mild,  
204 non-significant or no effect in a *PkaC1<sup>B3</sup>* background, suggesting that they are less  
205 dosage-sensitive (Figure S1).

206

## 207 **PKA is required for BBB continued growth in larvae and BBB maintenance in** 208 **adults**

209 For a more detailed analysis of PkaC1 function in BBB regulation, we turned to the SPG  
210 epithelium in third instar larvae. During the larval stage, no additional SPG cells are  
211 generated, instead the existing SPG cells grow enormously in size to maintain integrity  
212 of the BBB ([Li et al., 2017](#); [Unhavaithaya and Orr-Weaver, 2012](#)). By third instar, they  
213 have roughly doubled in size and are accessible via dissection of the CNS, which  
214 greatly facilitates the microscopic analysis. PKA activity in larvae can be manipulated  
215 specifically using the SPG-specific driver *moodyGAL4* ([Bainton et al., 2005](#); [Schwabe et](#)  
216 [al., 2005](#)), which becomes active only after epithelial closure and BBB sealing are  
217 completed in stage 17 embryos. PKA can be reduced by expression of transgenic RNAi  
218 targeting the PKA catalytic subunit C1 (*moody>PkaC1-RNAi*). On the other hand PKA  
219 can be elevated by expression of a mouse constitutively active PKA catalytic subunit  
220 (*moody>mPkaC1\**) ([Zhou et al., 2006](#)). We first examined whether normal Moody/PKA  
221 activity is required for BBB integrity during larval stages. To address this question, we  
222 developed a dye penetration assay to measure BBB permeability in cephalic complexes  
223 of third instar larval. This assay is similar to the one we performed in the late embryo,  
224 but with some important modifications (for details see Experimental Procedures).  
225 Interestingly, both elevated and reduced activity of Moody (*moody>LocoRNAi* and  
226 *moody>moodyRNAi*) and PKA (*moody>mPKAC1\** and *moody>PKAC1RNAi*) in SPG  
227 resulted in severe BBB insulation defects (Figure 2A and 2D). This strongly suggests  
228 that Moody/PKA signaling plays a crucial role in the continued growth of the BBB during  
229 larval stages. These effects were not merely carried over from the embryo, since under  
230 *moody* driver caused only mild dye penetration defects in embryos (Figure S2). Given  
231 that Moody activity has been implicated in the maintenance of the BBB in the adult



232 ([Bainton et al., 2005](#)), we also sought to knockdown PKA specifically in the adult SPG  
233 (*tubGal80ts, moody>PkaC1RNAi*) and measure the resulting effects (see Experimental  
234 Procedures). We indeed observed the dye penetrated the blood-eye barrier (Figure 2F),  
235 indicating that PKA is also required for BBB integrity function in the adult.

236 In order to better understand the cause of BBB permeability under conditions  
237 where Moody/PKA is changed, we examined SJ morphology in larvae. Most core SJ  
238 components show interdependence for correct localization and barrier function, with  
239 removal of one component sufficient to abolish SJ function ([Behr et al., 2003](#); [Genova  
240 and Fehon, 2003](#); [Hijazi et al., 2011](#); [Oshima and Fehon, 2011](#); [Wu et al., 2004](#)). We  
241 therefore asked whether PKA activity levels affect the distribution of different SJ  
242 components. Using both live imaging (*NrgGFP, LacGFP, NrxiVGFP*) and  
243 immunohistochemistry (Mega), we found that the circumferential SJ belts and outlines  
244 of SPG were marked nicely in WT (Figure 2C and S3). Strikingly, upon either reduction  
245 of Moody activity or elevated PKA activity, the SJ belt staining became much broader  
246 and more diffuse than in WT (Figure 2B). This suggests extensive plasma membrane  
247 overlap between neighboring SPG cells (Figure 2C). To confirm this idea, we introduced  
248 the membrane marker *gapGFP*, and indeed observed increased membrane overlap  
249 compared to WT (Figure 2C). Conversely, both elevated Moody activity and reduced  
250 PKA activity resulted in thinner SJ belts and reduced membrane (Figure 2B-C). To  
251 quantify these changes, we measured the mean width of the SJ belts under different  
252 PKA activity levels (Figure 2E; Experimental Procedures). The mean width of SJ belts  
253 increased with elevated PKA activity/reduced Moody activity and decreased under  
254 inverse conditions compared to WT (Figure 2H). These data demonstrate that Moody  
255 and PKA are required for the continued growth of the BBB and the proper organization  
256 of SJs during larval stages. Unlike the barrier defect, these morphological data reveal a  
257 monotonic relationship between PKA activity, membrane overlap and the amount of SJ  
258 components in the area of cell contact. The fact that the cellular defects of reduced  
259 Moody activity match those of elevated PKA activity, and vice versa, provides further  
260 evidence that PKA acts as an antagonistic effector of Moody signaling.

261

## 262 **PKA regulates the cytoskeleton and vesicle traffic in SPG**

263 We had previously reported that the Moody pathway regulates the organization of  
264 cortical actin and thus the cell shape of SPG during late embryogenesis ([Schwabe et al.,](#)  
265 [2005](#); [Schwabe et al., 2017](#)). Moreover, we proposed, based on the developmental  
266 timeline, that this in turn affects the positioning of SJ material along the lateral  
267 membrane. Given that the most striking phenotype caused by altered PKA activity is the  
268 extent of membrane overlap, we sought to further explore if PKA functions by regulating  
269 the cytoskeleton in SPG.

270 For this purpose, we examined the intracellular distribution of the actin cytoskeleton  
271 in the SPG at different PKA levels. As live markers we used *GFPactin*, which labels the  
272 entire actin cytoskeleton, *RFPmoesin* ([Schwabe et al., 2005](#)), which preferentially labels  
273 the cortical actin, the presumptive general MT marker *TauGFP* ([Jarecki et al., 1999](#)), the  
274 plus-end marker *EB1GFP* ([Rogers et al., 2004](#)), and the minus-end marker *NodGFP*  
275 ([Clark et al., 1997](#); [Cui et al., 2005](#)) (Figure 3A-D, and data not shown). In response to  
276 changes in PKA activity, all markers showed altered distributions similar to those  
277 observed with SJ markers. Specifically, elevated PKA activity caused all markers to  
278 become enriched at the cell cortex, consistent with the broader membrane overlap  
279 between neighboring SPG (Figure 3A-D, middle column). Conversely, upon reducing  
280 PKA activity, all markers were reduced or depleted from the cell cortex, consistent with  
281 reduced contact area between SPG (Figure 3A-D, right column). Thus, PKA signaling  
282 profoundly reorganizes the actin and MT cytoskeleton, thereby regulating the  
283 membrane overlap formed between neighboring SPG.

284 Since PKA has been shown to affect vesicle trafficking in epithelial cells and neurons  
285 ([Renger et al., 2000](#); [Vasin et al., 2014](#); [Wojtal et al., 2008](#); [Zhang et al., 2007](#)), we  
286 investigated if PKA signaling has a similar role during continued SPG cell growth. We  
287 introduced two live markers, *Rab4RFP*, which labels all the early endosomes (Figure  
288 3E), and *Rab11GFP* ([Artiushin et al., 2018](#)), which labels both early and recycling  
289 endosomes (Figure 3F). We observe significant changes in the cellular distribution of  
290 vesicle populations. Specifically, Rab4- and Rab11-labeled endosomes were  
291 differentially enriched in the cell periphery when PKA activity is increased, and

292 surrounded the nucleus when PKA was reduced, as compared to their broader  
293 cytoplasmic distribution profile in WT (Figure 3E and 3F). Therefore, upon increasing  
294 levels of PKA all cytoskeletal and vesicular markers responded with monotonic changes,  
295 resulting in their increasing accumulation at the cell cortex of SPG.

### 296 **The continuity of SJ belt is essential for BBB function as revealed by ssTEM**

297 While PKA gain- and loss-of-function show opposite morphologies of membrane overlap  
298 and SJ belt by light microscopy, they both result in a compromised leaky BBB. To better  
299 understand this incongruence, we sought to analyze membrane morphology at a higher  
300 resolution. Due to the small size of SJs (20-30nm), structural aspects can be analyzed  
301 conclusively only by electron microscopy. In the past, the acquisition and analysis of a  
302 complete series of TEM sections required an enormous effort; as a consequence,  
303 studies of SJ structure have mostly been restricted to random sections ([Carlson et al.,  
304 2000](#); [Hartenstein, 2011](#); [Stork et al., 2008](#); [Tepass and Hartenstein, 1994](#)). The  
305 problem has now become solvable, using digital image recording ([Suloway et al., 2005](#))  
306 and specialized software (Fiji, TrakEM2)([Cardona et al., 2012](#); [Schindelin et al., 2012](#))  
307 for both image acquisition and post-processing. Therefore, we performed serial section  
308 TEM, followed by computer-aided reconstruction of TEM stacks to resolve the 3D  
309 ultrastructure of cell contacts and SJs under different PKA activity levels at third instar  
310 larva (Figure 4A and 4B). This is the first time that a contiguous SJ belt between  
311 neighboring SPG at nanometer resolution is presented.

312 In WT, the area of cell-cell contact is compact and well-defined, with a dense SJ belt  
313 covering ~30% of the cell contact area (Figure 4A, 4B, and 4F). Upon elevated PKA  
314 activity, neighboring SPG show much deeper membrane overlap (Figure 4A-E). The  
315 areas of both cell contact and SJ coverage increase about two-fold compared with WT  
316 (Figure 4F), confirming the observations from confocal microscopy (Fig 3A-D), but the  
317 SJ belt is discontinuous and appears patchy (Figure 4B-E). This suggests that it is the  
318 continuity of the belt, rather than the total area covered by SJs, that is essential for  
319 generating the intercellular sealing capacity. To examine this question directly, we  
320 measured SJ length in randomly selected sections. Compared with WT, the mean  
321 length of individual SJ segments ( $0.69 \pm 0.08 \mu\text{m}$  vs.  $2.16 \pm 0.14 \mu\text{m}$ ,  $p < 0.0001$ ) is

322 indeed significantly decreased, while the mean total length of SJs ( $4.28 \pm 0.43 \mu\text{m}$  vs.  
323  $2.16 \pm 0.14 \mu\text{m}$ ,  $p=0.000523$ ) is significantly increased (Figure 4G).

324 Upon reducing PKA activity, the cell contacts and SJ area between neighboring  
325 SPGs were reduced, and the SJ belt became patchy as well (Figure 4A-E). In this case,  
326 both the mean total length of SJs ( $1.49 \pm 0.08 \mu\text{m}$  vs.  $2.16 \pm 0.14 \mu\text{m}$ ,  $p=0.000878$ ) and  
327 the mean length of individual SJ segments ( $0.67 \pm 0.14 \mu\text{m}$  vs.  $2.16 \pm 0.14 \mu\text{m}$ ,  
328  $p<0.0001$ ) were significantly shorter than in WT (Figure 4G). Intriguingly, the ratio of  
329 total SJ area to cell contact area remains constant at about 30% under all PKA activity  
330 conditions, despite the variable interdigitations between contacting SPG (Figure 4F).

331 Finally, SPG send apical protrusions into the neural cortex (Figure S4). These  
332 protrusions are much longer ( $2.01 \pm 0.01 \mu\text{m}$  vs.  $1.47 \pm 0.09 \mu\text{m}$ ,  $p=0.000230$ ) upon  
333 elevated PKA activity and shorter than in WT ( $0.68 \pm 0.09 \mu\text{m}$  vs.  $1.47 \pm 0.09 \mu\text{m}$ ,  
334  $p<0.0001$ ) upon reduced PKA activity, suggesting that PKA activity more generally  
335 controls membrane protrusions and extension (Figure S4).

336 Taken together, our ultrastructural analyses and new 3D models support the light  
337 microscopic findings, and they provide superior quantification of the relevant parameters.  
338 Importantly, cell contact and SJ area, as well as total SJ content are monotonically  
339 correlated with PKA activity, while individual SJ segment length is not. This suggests  
340 that the discontinuity of the SJ belt is the main cause for the observed BBB permeability  
341 defects.

342

### 343 **The Moody/PKA signaling pathway is polarized in SPG**

344 The SPG are very thin cells, measuring around  $0.2 \mu\text{m}$  along the apical-basal axis. In  
345 the embryo, the hemolymph-facing basal surface of the SPG is covered by a basal  
346 lamina ([Fessler et al., 1994](#); [Olofsson and Page, 2005](#); [Tepass and Hartenstein, 1994](#)),  
347 while during larval stages, the Perineurial Glia (PNG) form a second sheath directly on  
348 top of the SPG epithelium, which then serves as the basal contact for the SPG ([Stork et](#)  
349 [al., 2008](#)). Consistent with its chemoprotective function, the Mdr65 transporter localizes  
350 to the hemolymph-facing, basal surface of the SPG, while Moody localizes to the CNS-  
351 facing, apical surface ([Mayer et al., 2009](#)). The shallow lateral compartment contains

352 the SJs, which not only seal the paracellular space but also act as a fence and prevent  
353 diffusion of transmembrane proteins across the lateral compartment. The apical  
354 localization of Moody protein is dependent on the presence of SJs ([Schwabe et al.,](#)  
355 [2017](#)).

356 To visualize the subcellular protein distributions along the apical-basal axis, we  
357 labeled them together with the SPG nuclei (*moody>nucCherry*). We examined the  
358 subcellular distribution of PkaC1 by immunohistochemistry (anti-PKA catalytic subunit  
359 antibody, which only bind to the catalytic subunits of PKA dissociated from the  
360 regulatory subunits of PKA after cAMP activation, not binding to the inactive  
361 holoenzyme), and found that active PkaC1 is enriched on the basal side of the SPG,  
362 and thus the opposite of the apically localized Moody (Figure 5A). This result is  
363 intriguing given PKA's antagonistic role in Moody signaling and suggests that pathway  
364 activity may affect the localization of pathway components. The subcellular distribution  
365 of PkaC1 was indeed altered when Moody is knocked down. PkaC1 lost its basal  
366 intracellular localization and appeared spread out throughout the cytoplasm (Figure 5B).  
367 This suggests that apical Moody signaling is necessary for repressing apical PkaC1  
368 protein accumulation, and that this polarized subcellular localization results from the  
369 antagonistic relationship between Moody and PKA.

370

### 371 **MLCK and Rho1 function as PKA targets in the SPG**

372 Considering that the most pronounced effect of increasing PKA levels in the SPG is a  
373 commensurate increase in membrane overlap at the basolateral side, we sought to  
374 genetically identify PKA targets involved in this process. PKA is known to regulate  
375 actomyosin contractility by phosphorylating and inhibiting myosin light chain kinase  
376 (MLCK), which leads to a decrease in Myosin light chain (MLC) phosphorylation and a  
377 concomitant reduction of actomyosin contractility in cell migration and endothelial barrier  
378 ([Garcia et al., 1995](#); [Garcia et al., 1997](#); [Howe, 2004](#); [Tang et al., 2019](#); [Verin et al.,](#)  
379 [1998](#)). To determine whether MLCK is required for BBB function, we examined two  
380 MLCK zygotic mutants, *MLCK*<sup>02860</sup> and *MLCKC*<sup>234</sup>, and detected moderate BBB  
381 permeability in the late embryo (Figure 6A and S5), indicating that MLCK plays a role in

382 CNS insulation. Next, we asked whether PKA and MLCK function in the same signaling  
383 pathway using dominant genetic interaction experiments. We found that the BBB  
384 permeability of *PkaC1<sup>B3</sup>* heterozygous mutants could be rescued by removing one  
385 parental copy of *MLCK* (*MLCK<sup>02860</sup>* or *MLCK<sup>C234</sup>*) (Figure 6B). This suggests that MLCK  
386 interacts with PkaC1 in the SPG. Finally, we examined BBB insulation and SJ defects of  
387 *MLCK* zygotic mutant larva (*MLCK<sup>C234</sup>*). *MLCK<sup>C234</sup>* mutant larvae showed significant  
388 BBB permeability and a widened SJ belt (Figure 6C-F) compared to WT (Figure 2B), but  
389 the phenotypes were milder than those of PKA overactivity (Figure 2B).

390 PKA is also known to phosphorylate and inhibit the small GTPase Rho1, which  
391 reduces the activity of its effector Rho kinase (ROK), ultimately resulting in decreased  
392 MLC phosphorylation and actomyosin contractility ([Dong et al., 1998](#); [Garcia et al., 1999](#);  
393 [Howe, 2004](#); [Lang et al., 1996](#); [Tang et al., 2019](#); [Xu and Myat, 2012](#)). Moreover, RhoA  
394 activity has been shown to drive actin polymerization at the protrusion of migrating cells  
395 ([Machacek et al., 2009](#)), and a PKA-RhoA signaling has been suggested to act as a  
396 protrusion-retraction pacemaker at the leading edge of the migrating cells ([Tkachenko et](#)  
397 [al., 2011](#)). To check if Rho1 is required for BBB function, we determined the BBB  
398 permeability in the late embryo and third instar larval stages. Two loss-of-function  
399 alleles, the hypomorphic allele *Rho1<sup>1B</sup>* ([Magie and Parkhurst, 2005](#)) and the null allele  
400 *Rho1<sup>E.3.10</sup>* showed dye penetration defects as homozygous zygotic mutant embryos,  
401 with the null allele showing a particularly pronounced effect (Figure 6B and S5). At the  
402 larval stage, the SPG-specific Rho1 knockdown (*moody>Rho1RNAi*) resulted in strong  
403 dye penetration into the nerve cord (Figure 6C and 6E). These results suggest that  
404 Rho1 is required for the formation and continued growth of the BBB. We again asked  
405 whether PKA and Rho1 function in the same pathway and performed dominant genetic  
406 interaction experiments using a sensitized genetic background. The embryonic dye  
407 penetration defects of PkaC1 heterozygous mutants (*PkaC1<sup>B3</sup>*) were significantly  
408 reduced by removing one genomic copy of the Rho1 null allele (*Rho1<sup>E.3.10</sup>*), but not by  
409 removing one copy of the hypomorphic allele *Rho1<sup>1B</sup>* (Figure 6B). These findings  
410 suggest that Rho1 is a PKA target in BBB regulation. Collectively, our results indicate



411 that PKA suppresses actomyosin contractility in a two-pronged fashion, by negatively  
412 regulating both MLCK and Rho1.

413

## 414 **Discussion**

415 Previous studies implicated a novel GPCR signaling pathway in the formation of the  
416 *Drosophila* BBB in late embryos ([Bainton et al., 2005](#); [Schwabe et al., 2005](#)). This work  
417 also revealed that besides the GPCR Moody, two heterotrimeric G proteins (Gaiβγ,  
418 Gaoβγ) and the RGS Loco participate in this pathway. Here we provide a  
419 comprehensive molecular and cellular analysis of the events downstream of G protein  
420 signaling using a candidate gene screening approach. We present new, more sensitive  
421 methods for phenotypic characterization, and extended the analysis beyond the embryo  
422 into larval stages. This work identifies PKA, together with some of its targets, as crucial  
423 antagonistic effectors in the continued cell growth of SPG and maintenance of the BBB  
424 sealing capacity. This role is critical to ensure proper neuronal function during BBB  
425 formation and maturation.

426 Multiple lines of evidence demonstrate a role of PKA for proper sealing of the BBB:  
427 loss of PKA activity lead to to BBB permeability defects, irregular growth of SPG during  
428 epithelium formation, reduced membrane overlap and a narrower SJ belt at SPG cell-  
429 cell contacts. The role of PKA as an effector of the Moody signaling pathway is further  
430 supported by dominant genetic interaction experiments, which show that the dye  
431 penetration phenotype of *PkaC1* heterozygous mutant embryos was partially rescued  
432 by removing one genomic copy of *Gβ13F* or *loco*. Moreover, the analysis of the larval  
433 phenotype with live SJ and cytoskeleton markers shows that PKA gain-of-function  
434 behaved similarly to Moody loss-of-function. Conversely, PKA loss-of-function  
435 resembled the overexpression of *GaoGTP*, which mimics Moody gain-of-function  
436 signaling.

437 Our results from modulating PKA activity suggest that the total cell contact and SJ  
438 areas are a monotonic function of PKA activity: low levels of activity cause narrow  
439 contacts, and high levels give rise to broad contacts. Moreover, the analysis of various  
440 cellular markers (actin, microtubules, SJs, vesicles) indicates that the circumferential



441 cytoskeleton and delivery of SJ components respond proportionately to PKA activity.  
442 This, in turn, promotes the increase in cell contact and junction areas coordinately at the  
443 lateral side of SPG. Our experiments demonstrate that the modulation of the SPG  
444 membrane overlap by PKA proceeds, at least in part, through the regulation of  
445 actomyosin contractility, and that this involves the phosphorylation targets MLCK and  
446 Rho1. This suggests that crucial characteristics of PKA signaling are conserved across  
447 eukaryotic organisms ([Bauman et al., 2004](#); [Marks and Kalderon, 2011](#); [Park et al.,  
448 2000](#); [Taylor et al., 1990](#); [Tkachenko et al., 2011](#); [Walker et al., 2013](#)).

449 At the ultrastructural level, our ssTEM analysis of the larval SPG epithelium clarifies  
450 the relationship between the inter-cell membrane overlaps and SJ organization and  
451 function. Across different PKA activity levels, the ratio of septate junction areas to the  
452 total cell contact area remained constant at about 30%. This proportionality suggests a  
453 mechanism that couples cell contact with SJ formation. In this process the primary job  
454 of Moody/PKA appears to be the control of membrane overlap. This is consistent with  
455 the results of a temporal analysis of epithelium formation and SJ insertion in late  
456 embryos of WT and Moody pathway mutants, which shows that membrane contact  
457 precedes and is necessary for the appearance of SJs ([Schwabe et al., 2017](#)). The  
458 finding that the surface area that SJs occupy did not exceed a specific ratio, irrespective  
459 of the absolute area of cell contact, suggests an intrinsic, possibly steric limitation in  
460 how much junction can be fitted into a given cell contact space. While most phenotypic  
461 effects are indeed a monotonic function of Moody and PKA activity, the discontinuity  
462 and shortening of individual SJ strands is not. It occurred with both increased and  
463 decreased signaling and appears to cause the leakiness of the BBB in both conditions.  
464 Our ssTEM-based 3D reconstruction thus demonstrates that the total area covered by  
465 SJs and the length of individual contiguous SJ segments are independent parameters.  
466 The latter appears to be critical for the paracellular seal, consistent with the idea that  
467 Moody plays a role in the formation of continuous SJ stands ([Babatz et al., 2018](#)).

468 The asymmetric localization of PKA that we observed sheds further light on the  
469 establishment and function of apical-basal polarity in the SPG epithelium. Prior to  
470 epithelium formation, contact with the basal lamina leads to the first sign of polarity

471 (Schwabe et al., 2017). Moody becomes localized to the apical surface only after  
472 epithelial closure and SJ formation, suggesting that SJs are required as a diffusion  
473 barrier and that apical accumulation of Moody protein is the result of polarized  
474 exocytosis or endocytosis (Schwabe et al., 2017). Here, we now show that the  
475 intracellular protein PKA catalytic subunit-PkaC1 accumulates on the basal side of SPG,  
476 and that this polarized accumulation requires (apical) Moody activity. Such an  
477 asymmetric, activity-dependent localization has not previously been described for PKA  
478 in endothelium, and while the underlying molecular mechanism is unknown, the finding  
479 underscores that generating polarized activity along the apical-basal axis of the SPG is  
480 a key element of Moody pathway function.

481 An intriguing unresolved question is how increased SPG cell size and SJ length can  
482 keep up with the expanding brain without disrupting the BBB integrity during larva  
483 growth. We found that the SJ grows dramatically in length ( $0.57 \pm 0.07 \mu\text{m}$  vs  $2.16 \pm$   
484  $0.14 \mu\text{m}$ , about 3.7 fold) from the late embryo (Figure 1E) to 3rd instar larva (Figure 4G),  
485 which matches the increased cell size of SPG (about 4 fold) ([Babatz et al., 2018](#);  
486 [Unhavaithaya and Orr-Weaver, 2012](#)). During the establishment of the SPG epithelium  
487 in the embryo, both increased and decreased Moody signaling resulted in asynchronous  
488 growth and cell contact formation along the circumference of SPG, which in turn led to  
489 irregular thickness of the SJ belt ([Schwabe et al., 2017](#)). Therefore, a similar  
490 relationship may exist during the continued growth of the SPG epithelium in larvae, with  
491 the loss of continuity of SJ segments in Moody/PKA mutants resulting from  
492 unsynchronized expansion of the cell contact area and an ensuing erratic insertion of SJ  
493 components. Since SJs form relatively static complexes, any irregularities in their  
494 delivery and insertion may linger for extended periods of time ([Babatz et al., 2018](#);  
495 [Deligiannaki et al., 2015](#); [Oshima and Fehon, 2011](#)). The idea that shortened SJ  
496 segments are a secondary consequence of unsynchronized cell growth is strongly  
497 supported by our finding that disruption of actomyosin contractility in MLCK and Rho1  
498 mutants compromises BBB permeability.

499 Collectively, our data suggest the following model: polarized Moody/PKA signaling  
500 controls the cell growth and maintains BBB integrity during the continuous

501 morphogenesis of the SPG secondary epithelium. On the apical side, Moody activity  
502 represses PKA activity (restricting local cAMP level within the apial-basal axis in SPG)  
503 and thereby promotes actomyosin contractility. On the basal side, which first adheres to  
504 the basal lamina and later to the PNG sheath, PKA activity suppresses actomyosin  
505 contractility via MLCK and Rho1 phosphorylation and repression (Figure 7).  
506 Throughout development, the SPG grow continuously while extending both their cell  
507 surface and expanding their cell contacts. Our data suggest that the membrane  
508 extension occurs on the basolateral surface through insertion of plasma membrane and  
509 cell-adhesive proteins, with similar behavior in epithelial cell, but regulated by a distinct  
510 polarized Moody/PKA signaling in SPG ([Wojtal et al., 2008](#)). In analogy to motile cells,  
511 the basal side of the SPG would thus act as the 'leading edge' of the cell, while the  
512 apical side functions as the 'contractile rear' ([Nelson, 2009](#)). According to this model,  
513 Moody/Rho1 regulate actomyosin to generate the contractile forces at the apical side to  
514 driving membrane contraction, which directs the basolateral insertion of new membrane  
515 material and SJs. In this way, differential contractility and membrane insertion act as a  
516 conveyor belt to move new formed membrane contacts and SJ from the basolateral to  
517 apical side. Loss of Moody signaling leads to symmetrical localization of PKA and to  
518 larger cell contact areas between SPG due to diminished apical constriction.  
519 Conversely, loss of PKA causes smaller cell contact areas due to increased basal  
520 constriction.

521 Our results may have important implications for the development and maintenance  
522 of the BBB in vertebrates. The vertebrates BBB consists of a secondary epithelium  
523 with interdigitations similar to the ones between the *Drosophila* SPG ([Chow and Gu, 2015](#);  
524 [Cong and Kong, 2020](#); [Hindle and Bainton, 2014](#); [Reinhold and Rittner, 2017](#)).  
525 While the sealing is performed by tight junctions, it will be interesting to investigate  
526 whether there are similarities in the underlying molecular and cellular mechanisms that  
527 mediate BBB function ([Artiushin et al., 2018](#); [Cong and Kong, 2020](#); [Sugimoto et al., 2020](#)).  
528

529

## 530 **Experimental Procedures**

### 531 **Fly Strains and Constructs**

532 The following fly strains were obtained from published sources: *PkaC1<sup>H2</sup>* (BDSC Cat#  
533 4101, RRID:BDSC\_4101); *PkaC1<sup>B3</sup>*; *PkaC1<sup>A13</sup>*; *UASmPkaC1\*(mC\*)*(D. Kalderon);  
534 *moodyGAL4* (T. Schwabe); *repoGAL4* (V. Auld); *Nrg<sup>G305</sup>* (*NrgGFP*; W.Chia);  
535 *UASGFPMoesin* (D.Kiehart); *UASmRFPMoesin* (T. Schwabe); *Gβ13F<sup>Δ1-96A</sup>* (F.  
536 Matsuzaki); *UAStauGFP* (M. Krasnow); *UASG<sub>α</sub>GTP* (A. Tomlinson), *loco<sup>A13</sup>* (C.  
537 Klämbt); *moody<sup>A17</sup>*(R. Bainton); *moody-RNAi* (R. Bainton); *UASnucmCherry* (T.  
538 Schwabe); *UASGFPEB1* (D. Brunner); *UASGFPNod*, *UASGFPRho*, *UASactinGFP*,  
539 *UASRab4RFP*, *Rho<sup>72R</sup>*, *Rho<sup>1B</sup>*, *MLCK<sup>O2860</sup>*, *MLCK<sup>C234</sup>*, *tubGAL80<sup>ts</sup>* (Bloomington Stock  
540 Center); *PkaC1<sup>KK108966</sup>*, *Rho1<sup>KK108182</sup>*, *Tau<sup>GD8682</sup>*(VDRRC). For live genotyping, mutant and  
541 transgenic lines were balanced (*Kr::GFP*) ([Casso et al., 1999](#)) or positively marked  
542 using *nrgNrgGFP*. Temperature-sensitive control of gene expression in SPG is  
543 achieved by using a *tubGAL80ts*; *moodyGAL4* driver. All strains were raised at 25°C.  
544 except for *tubGAL80ts*; *moodyGAL4* crosses, which were raised at 18°C until 1 day  
545 after eclosion and then shifted to 29°.

546

### 547 **Live Imaging**

548 Dissected third-instar larval cephalic complexes were mounted in PBS and imaged  
549 directly. All confocal images were acquired using a Zeiss LSM 510 or 710 system.  
550 Stacks of 20-40 0.5 μm confocal sections were generated; image analysis was  
551 performed using Zeiss LSM 510, Image J (NIH) or Imaris 4.0 (Bitplane) software. The  
552 results for each section were assembled as a separate channel of the stack. Time-lapse  
553 recordings were carried out on 12h AEL embryos raised at 20°C using an inverted Zeiss  
554 LSM 510 confocal microscope. To increase signal strength, the pinhole was opened to  
555 1.3 (z-section thickness 0.6 μm), and z-stacks of 12 sections were acquired once per  
556 minute. To adjust for focus drift, which is mainly caused by rotation of the embryo, the z-  
557 stack coordinates were adjusted at various time-points without disrupting the continuity  
558 of the movie. Between 5 and 7 movies were captured per genotype, each 80-110 min in  
559 duration.

560

## 561 **Immunohistochemistry**

562 Immunohistochemistry was performed following standard procedures ([Bainton et al.,](#)  
563 [2005](#); [Schwabe et al., 2005](#)). The antibodies used in the study were: rabbit  $\alpha$ -PkaC1  
564 (1:400, Pka-C1, RRID:AB\_2568479) ([Lane and Kalderon, 1993](#)), mouse  $\alpha$ -PkaC1  
565 (1:100, BD), mouse  $\alpha$ -REPO (1:10, Developmental Studies Hybridoma Bank), mouse  $\alpha$ -  
566 GFP (1:100, Molecular Probes), mouse  $\alpha$ -Mega (1:100, R. Schuh), guinea pig  $\alpha$ -  
567 dContactin (1:1000, M. Bhat), rabbit  $\alpha$ -RFP (1:100, US Biological). Fluorescent  
568 secondary antibodies were coupled to Cy3 (1:500, Jackson), Alexa Fluor 488 or Alexa  
569 Fluor 633 (1:500, Molecular Probes). Rat  $\alpha$ -Moody  $\beta$  was generated in the lab (1:500).

570

## 571 **Image analysis**

572 The width of the SJ belt was extracted from Maximum Intensity Projections (MIP) along  
573 the z-axis of 3D confocal stacks of the nervous system. Specifically, we used Imaris 4.0  
574 (Bitplane) to perform 2D segmentation of the GFP-marked SJs. For each of the markers,  
575 an optimal threshold for the pixel intensity was chosen by fitting the obtained segmented  
576 pattern with the raw fluorescence signal. To evaluate the average thickness of the SJs,  
577 we split the SJ segments into sections of 3-4 $\mu$ m in length. An approximation of the  
578 diameters of the single sections was then obtained by extracting their ellipticity  
579 parameters along the axis perpendicular to their main axis. A mean diameter of the SJ  
580 was calculated by averaging over the diameters of all single sections.

581

## 582 **Dye-penetration assay in embryo, third instar larva, and adult flies**

583 The dye penetration assay in embryos was performed as described ([Schwabe et al.,](#)  
584 [2005](#)). For the dye penetration assay in third instar larvae, a fluorescent dye (Texas red-  
585 coupled dextran, 10 kDa, 10mg/ml, Molecular Probes) was injected into the body cavity  
586 of third instar larva. After 2.5 h, the cephalic complex was dissected, and the dye  
587 penetrated into the nerve cord was analyzed using Zeiss LSM710 confocal microscopy.  
588 Dye penetration was quantified by calculating the percentage of larva showing dye  
589 penetration and by measuring the mean pixel intensity within a representative window of

590 the ventral portion of the nerve cord using Fiji software, and normalized by dividing by  
591 the mean of the WT control group. To assess the significance of effects for the  
592 embryonic and larval dye penetration assays either ordinary or Welch's ANOVA was  
593 performed, with Dunnett's/Dunnett's T3 or Tukey's multiple comparisons test.

594 The dye penetration assay in adult flies was performed as described in Bainton et al.  
595 (2005) with some modifications. Briefly, adult flies were hemolymph injected with  
596 10mg/ml 10kDa Texas red-coupled dextran. After 2h, the injected flies were decapitated  
597 and their heads were mounted in a fluorinated grease covered glass slides with two  
598 compound eyes on the side (the proboscis facing up). Images were acquired on a Zeiss  
599 LSM710 confocal microscope at 200-300  $\mu\text{m}$  depths from the eye surface with a Plan  
600 Fluor 10xw objective. Dye penetration was quantified by measuring the mean pixel  
601 intensities within a representative window of the central region of retina (n=18-30) of  
602 maximum-intensity Z projection of each image stack (z-section thickness 0.6  $\mu\text{m}$ ) by Fiji  
603 software, and normalized by dividing by the WT control. Statistical significance was  
604 assessed using the two-tailed t-test.

605

### 606 **Transmission Electron Microscopy (TEM)**

607 Late Stage 17 (22-23 hr AEL) embryos were processed by high pressure freezing in  
608 20% BSA, freeze-substituted with 2% OsO<sub>4</sub>, 1% glutaraldehyde and 0.2% uranyl  
609 acetate in acetone (90%), dH<sub>2</sub>O (5%), methanol (5%) over 3 days (-90°C to 0°C),  
610 washed with acetone on ice, replaced with ethanol, infiltrated and embedded in Spurr's  
611 resin, sectioned at 80 nm and stained with 2% uranyl acetate and 1% lead citrate for 5  
612 min each. Sections were examined with a FEI TECNAI G2 Spirit BioTwin TEM with a  
613 Gatan 4K x 4K digital camera. For quantification, random images were shot, and the  
614 length of visible SJ membrane stretches in each image was measured using Fiji  
615 software. Statistics were calculated using the two-tailed Student's t-test.

616

### 617 **Serial-section transmission electron microscopy (ssTEM)**

618 Freshly dissected third instar larval CNSs were fixed in 2% glutaraldehyde and 2%  
619 OsO<sub>4</sub> in 0.12 M sodium cacodylate (pH 7.4) by microwave (Ted Pella, BioWave Pro MW)



620 as follows: 30'' at 300W, 60'' OFF, 30'' at 350W; 60'' OFF, 30'' at 400W. The samples  
621 were then rinsed 2x5' with cold 0.12 M sodium cacodylate buffer; post-fixed with 1%  
622 OsO<sub>4</sub> in 0.12 M sodium cacodylate buffer (pH 7.4) on an ice bath by microwave as  
623 follows: 30'' at 350W, 60'' OFF, 30'' at 375W, 60'' OFF, 30'' at 400W; rinsed 2x5' with  
624 0.12 M sodium cacodylate buffer at RT; 2x5' with distilled water at RT; stained in 1%  
625 uranyl acetate overnight in 4°C; rinsed 6x5' with distilled water; dehydrated with ethanol  
626 followed by propylene oxide (15'); infiltrated and embedded in Eponate 12 with 48h  
627 polymerization in a 65°C oven. 50 nm serial sections were cut on a Leica UC6  
628 ultramicrotome and picked up with Synaptek slot grids on a carbon coated Pioloform  
629 film. Sections were post-stained with 1% uranyl acetate followed by Sato's (1968) lead.  
630 The image acquisition of multiple sections (~150 sections in each genotype) and large  
631 tissue areas were automatically captured with a Gatan 895 4K x 4K camera by a FEI  
632 Spirit TECNAI BioTWIN TEM using Leginon ([Suloway et al., 2005](#)). TrakEM2 software  
633 was used to montage, align images, trace and reconstruct 3D SJ structures between  
634 contacting SPG within and across serial sections. For quantification, random images  
635 were chosen, and the length of visible SJs stretches and membrane contacting area in  
636 each image were measured using Fiji. The statistical analysis was performed using  
637 Welch's ANOVA with Dunnett's T3 multiple comparisons test.

638

### 639 **Author contributions**

640 X.L. and U.G. conceived and designed the study, X.L. and R.F. performed experiments,  
641 X.L., R.F., T.S., C.J., and U.G. analyzed and discussed data, H.S. provided laboratory  
642 resources and advice, X.L., U.G., and H.S. wrote the manuscript.

643

### 644 **Acknowledgements**

645 We would like to thank D. Kalderon, R. Bainton, G. Beitel, V. Auld, M. Bhat, W. Chia, Y.  
646 Hiromi, M. Hortsch, B. Jones, D. Kiehart, C. Klämbt, J. Knoblich, M. Krasnow, M. Peifer,  
647 A. Tomlinson, R. Tsien, and the Developmental Studies Hybridoma Bank for providing  
648 us with fly strains, constructs, and antibodies. Special thanks go to U. Unnerstall, M.  
649 Deligiannaki, A. Casper, M. Schroeder, S. Axelrod, and E. Kurant for their helpful



650 comments on the manuscript. We are grateful to all members of the Gaul and Steller  
651 labs for their continued support of this work.

652

### 653 **Competing interests**

654 The authors declare no competing financial interests.

655

### 656 **Funding**

657 This work was supported by an Alexander von Humboldt-Professorship from the  
658 Bundesministerium für Bildung und Forschung (U.G.), the Center for Integrated Protein  
659 Science (U.G.), the NIH (5R01EY011560) (U.G., X.L.), U.G. acknowledges support by  
660 the Deutsche Forschungs gemeinschaft (SFB 646, SFB 1064, CIPSM, QBM) and the  
661 Bundesministerium für Bildung und Forschung (Alexander von Humboldt-Professorship,  
662 BMBF: ebio).

663

664

665 **Figure legends**

666 **Figure 1. PKA is required for BBB formation and acts in the Moody signaling**  
667 **pathway.** (A) Single confocal sections of dye-injected embryos of WT and PKA zygotic  
668 mutants. (B) Quantification of the dye penetration assay. Columns represent the  
669 intensity of dye penetration into the nerve cord as measured by the mean pixel intensity  
670 (see Experimental Procedures),  $\pm$ SEM, n=16-41. *Loco* <sup>$\Delta$ 13</sup> zygotic mutants serve as  
671 positive controls. (C) Repo staining revealing the number and positions of SPG nuclei in  
672 WT and PKA zygotic mutants using an illuminated projection to highlight the ventral  
673 surface of the nerve cord. (D) Transmission electron micrographs of the interface of  
674 neighboring SPG in late WT and *PkaC1*<sup>H2</sup> zygotic mutant embryos. Yellow brackets  
675 delineate the SJ ultrastructure; high magnifications are shown in red boxes. (E)  
676 Quantification of SJ length in WT and *PkaC1*<sup>H2</sup> mutants (see Experimental Procedures).  
677 Columns represent mean SJ length as measured in random nerve cord sections,  $\pm$ SEM,  
678 n=56-70. (F) Time-lapse recording of BBB closure in embryos of WT and *PKA* zygotic  
679 mutants. 6  $\mu$ m confocal stacks are shown; in each image, 4-6 ventral SPG are  
680 highlighted (green); midline channels (stars) and retarded growth (arrows) are marked.  
681 (G) Dominant genetic interactions between *PkaC1*<sup>B3</sup> and *G $\beta$ 13F* <sup>$\Delta$ 1-96A</sup> as quantified by  
682 dye penetration in the embryo. Columns represent the intensity of dye penetration as  
683 measured by the mean pixel intensity,  $\pm$ SEM, n=34-48. In (B) and (G), the percentage  
684 of embryos showing the dye penetration is indicated at the bottom of each column.  
685 Brackets and asterisks in (B), (E) and (G) indicate statistical significance levels as  
686 assessed by one-way ANOVA with Dunnett's multiple comparisons test (B) and (G) or  
687 the two-tailed Student's t-test (E), n.s. p> 0.05; \*p<0.05; \*\*p<0.01; \*\*\*p<0.001.

688

689

690 **Figure 2. Moody/PKA signaling is required for BBB growth in the larva and for**  
691 **BBB maintenance in the adult.** (A) Single confocal sections of dye injected third instar  
692 larval nerve cords under different Moody/PKA activity levels. (B-C) Morphology of SPG  
693 SJ belts and membrane overlap at different Moody/PKA activity levels, as visualized by  
694 SJ markers NrgGFP (B), and the membrane marker GapGFP (C). (D) Quantification of  
695 the dye penetration assay. Columns represent intensity of dye penetration as measured  
696 by mean pixel intensity (see Experimental Procedures),  $\pm$ SEM, n=44-88. The  
697 percentage of larva showing dye penetration is indicated at the bottom of each column.  
698 (E) Quantification of the diameter of SJ belts under different GPCR/PKA activity levels,  
699 using the SJ marker NrgGFP.  $\pm$ SEM, n=7-28. (F) Dye penetration in adult flies as  
700 shown in z-projections of dye-injected adult heads. (G) Quantification of dye penetration  
701 in adult eye. Columns represent intensity of dye penetration as measured by mean pixel  
702 intensity in adult eye (see Experimental Procedures),  $\pm$ SEM, n=30 and 18. Asterisks in  
703 (D), (E), and (G) indicate significance levels of comparisons based on Welch's ANOVA  
704 with Dunnett's T3 multiple comparisons test (D) and (E) or the two-tailed Student's t-test  
705 (G), n.s.  $p>0.05$ ; \* $p<0.05$ ; \*\* $p<0.01$ , \*\*\* $p<0.001$ .

706

707

708 **Figure 3. PKA regulates the cytoskeleton and vesicle distribution in SPG.** Under  
709 different PKA activity levels, the actin cytoskeleton is visualized by GFPactin (A), the  
710 microtubule cytoskeleton by the general MT marker TauGFP (B), the plus-end marker  
711 EB1GFP (C) and the minus-end marker NodGFP (D), the cellular distribution of  
712 vesicles by the early endosome markers Rab4RFP (E) and Rab11GFP (F) with the SJ  
713 marker NrgGFP labeling the cell periphery of the SPG (E).

714

715

716

717 **Figure 4. The continuity of the SJ belt is essential for BBB function as revealed by**

718 **ssTEM.** (A-E) SJ ultrastructure at the interface of neighboring SPG in third instar larvae

719 under different PKA activity levels. SPG1, its neighbor SPG2 and their shared SJs are

720 colored or shaded in red, magenta and green, respectively. (A and B) A 3D model of SJ

721 ultrastructure generated by ssTEM. (C) Representative sections of SJs. (D and E) High

722 magnification views of boxed regions in C with and without shading. (F) Quantification of

723 SJ surface area (green column) and the contact area (grey column), and the ratio

724 between the two (black point) under different PKA activity levels,  $\pm$ SEM, n=15-21. (G)

725 Quantification of the mean length of individual SJ segments (green) and the mean total

726 length of SJs (blue) under different PKA activity levels, measured in random nerve cord

727 sections,  $\pm$ SEM, n=9-92. Asterisks in (F-G) indicate significance levels of comparisons

728 based on Welch's ANOVA with Dunnett's T3 multiple comparisons test, n.s.  $p>0.05$ ;

729 \* $p<0.05$ ; \*\* $p<0.01$ , \*\*\* $p<0.001$ .

730

731

732 **Figure 5. The Moody/PKA signaling pathway is polarized in SPG.** The subcellular  
733 localization of the PKA catalytic subunit PkaC1 and Moody in SPG of third instar larvae  
734 in WT (A) and *moody* knockdown (B). Antibody labeling of Moody (magenta), of  
735 *Drosophila* PkaC1 or mouse PkaC1 (green), and of SPG nuclei (*moody>nucCherry*;  
736 red). Lateral views of the CNS/hemolymph border, with CNS facing top. On the right,  
737 line scans of fluorescence intensities for each channel along the apical-basal axis at the  
738 positions indicated.

739

740

741 **Figure 6. MLCK and Rho1 function as PKA targets in SPG.** (A) Quantification of dye  
742 penetration effects in the embryo of *MLCK* and *Rho1*. (B) Dominant genetic interactions  
743 between *PkaC1<sup>B3</sup>* and *MLCK* and *Rho1* mutant heterozygotes as quantified by dye  
744 penetration in the embryo. In (A) and (B), columns represent the strength of dye  
745 penetration into the nerve cord as measured by the mean pixel intensity,  $\pm$ SEM, n=14-  
746 98. (C-D) BBB phenotype of *MLCK* zygotic mutant and SPG-specific Rho1 knockdown  
747 (*moody>Rho1RNAi*) animals in single confocal sections of dye injected third instar  
748 larvae (C), and SJ morphology using the NrgGFP marker (D), with width of SJ belt  
749 highlighted by arrows. (E) Quantification of the dye penetration assay from (C).  
750 Columns represent intensity of dye penetration as measured by mean pixel intensity  
751 and normalized to WT mean (see Experimental Procedures),  $\pm$ SEM, n=13-19. (F)  
752 Quantification of the mean diameter of SJ belts from (D),  $\pm$ SEM, n= 8-13. In (A), (B) and  
753 (E) the percentage of animals showing dye penetration is indicated at the bottom of  
754 each column. Asterisks in (A), (B), (E) and (F) indicate significance levels of  
755 comparisons against either WT in (A), (E) and (F) or *PkaC1<sup>B3</sup>* group in (B) based on  
756 one-way ANOVA with Dunnett's multiple comparisons test in (A) and (B) or Welch's  
757 ANOVA with Dunnett's T3 multiple comparison test (E) and (F), n.s.  $p>0.05$ ; \* $p<0.05$ ;  
758 \*\* $p<0.01$ , \*\*\* $p<0.001$ .

759



760

761 **Figure 7. Model of Moody/PKA signaling in the glial BBB.** Schematic depicting  
762 polarized Moody/PKA signaling along the apical-basal axis and its cellular function in  
763 controlling SPG continued cell growth and BBB integrity by differentially regulating  
764 actomyosin contractility and SJ organization spatiotemporally. For detailed description  
765 see Discussion.

766

767

768

## 769 **References**

- 770 Artiushin, G., Zhang, S.L., Tricoire, H., and Sehgal, A. (2018). Endocytosis at the *Drosophila*  
771 blood-brain barrier as a function for sleep. *Elife* 7.
- 772 Babatz, F., Naffin, E., and Klambt, C. (2018). The *Drosophila* Blood-Brain Barrier Adapts to Cell  
773 Growth by Unfolding of Pre-existing Septate Junctions. *Dev Cell* 47, 697-710 e693.
- 774 Bainton, R.J., Tsai, L.T., Schwabe, T., DeSalvo, M., Gaul, U., and Heberlein, U. (2005). moody  
775 encodes two GPCRs that regulate cocaine behaviors and blood-brain barrier permeability in  
776 *Drosophila*. *Cell* 123, 145-156.
- 777 Banerjee, S., Sousa, A.D., and Bhat, M.A. (2006). Organization and function of septate junctions:  
778 an evolutionary perspective. *Cell biochemistry and biophysics* 46, 65-77.
- 779 Bauman, A.L., Goehring, A.S., and Scott, J.D. (2004). Orchestration of synaptic plasticity through  
780 AKAP signaling complexes. *Neuropharmacology* 46, 299-310.
- 781 Behr, M., Riedel, D., and Schuh, R. (2003). The claudin-like Megatrachea is essential in septate  
782 junctions for the epithelial barrier function in *Drosophila*. *Developmental Cell* 5, 611-620.
- 783 Cardona, A., Saalfeld, S., Schindelin, J., Arganda-Carreras, I., Preibisch, S., Longair, M., Tomancak,  
784 P., Hartenstein, V., and Douglas, R.J. (2012). TrakEM2 software for neural circuit reconstruction.  
785 *PLoS One* 7, e38011.
- 786 Carlson, S.D., Juang, J.L., Hilgers, S.L., and Garment, M.B. (2000). Blood barriers of the insect.  
787 *Annual review of entomology* 45, 151-174.
- 788 Casso, D., Ramirez-Weber, F.A., and Kornberg, T.B. (1999). GFP-tagged balancer chromosomes  
789 for *Drosophila melanogaster*. *Mech Dev* 88, 229-232.
- 790 Chen, X., and Ganetzky, B. (2012). A neuropeptide signaling pathway regulates synaptic growth  
791 in *Drosophila*. *J Cell Biol* 196, 529-543.
- 792 Chow, B.W., and Gu, C. (2015). The molecular constituents of the blood-brain barrier. *Trends*  
793 *Neurosci* 38, 598-608.
- 794 Clark, I.E., Jan, L.Y., and Jan, Y.N. (1997). Reciprocal localization of Nod and kinesin fusion  
795 proteins indicates microtubule polarity in the *Drosophila* oocyte, epithelium, neuron and  
796 muscle. *Development* 124, 461-470.
- 797 Cong, X., and Kong, W. (2020). Endothelial tight junctions and their regulatory signaling  
798 pathways in vascular homeostasis and disease. *Cellular signalling* 66, 109485.
- 799 Cui, W., Sproul, L.R., Gustafson, S.M., Matthies, H.J., Gilbert, S.P., and Hawley, R.S. (2005).  
800 *Drosophila* Nod protein binds preferentially to the plus ends of microtubules and promotes  
801 microtubule polymerization in vitro. *Mol Biol Cell* 16, 5400-5409.
- 802 Deligiannaki, M., Casper, A.L., Jung, C., and Gaul, U. (2015). Pasiflora proteins are novel core  
803 components of the septate junction. *Development* 142, 3046-3057.
- 804 Dong, J.M., Leung, T., Manser, E., and Lim, L. (1998). cA MP-induced Morphological Changes Are  
805 Counteracted by the Activated RhoA Small GTPase and the Rho Kinase ROKalpha. *Journal of*  
806 *Biological Chemistry* 273, 22554-22562.

807 Edwards, J.S., Swales, L.S., and Bate, M. (1993). The Differentiation between Neuroglia and  
808 Connective-Tissue Sheath in Insect Ganglia Revisited - the Neural Lamella and Perineurial  
809 Sheath-Cells Are Absent in a Mesodermless Mutant of *Drosophila*. *J Comp Neurol* 333, 301-308.  
810 Faivre-Sarrailh, C., Banerjee, S., Li, J.J., Hortsch, M., Laval, M., and Bhat, M.A. (2004). *Drosophila*  
811 contactin, a homolog of vertebrate contactin, is required for septate junction organization and  
812 paracellular barrier function. *Development* 131, 4931-4942.  
813 Fessler, L.I., Nelson, R.E., and Fessler, J.H. (1994). *Drosophila* extracellular matrix. *Methods in*  
814 *enzymology* 245, 271-294.  
815 Garcia, J.G., Davis, H.W., and Patterson, C.E. (1995). Regulation of endothelial cell gap  
816 formation and barrier dysfunction: role of myosin light chain phosphorylation. *Journal of*  
817 *cellular physiology* 163, 510-522.  
818 Garcia, J.G., Lazar, V., Gilbert-McClain, L.I., Gallagher, P.J., and Verin, A.D. (1997). Myosin light  
819 chain kinase in endothelium: molecular cloning and regulation. *American journal of respiratory*  
820 *cell and molecular biology* 16, 489-494.  
821 Garcia, J.G., Verin, A.D., Schaphorst, K., Siddiqui, R., Patterson, C.E., Csontos, C., and Natarajan,  
822 V. (1999). Regulation of endothelial cell myosin light chain kinase by Rho, cortactin, and  
823 p60(src). *Am J Physiol* 276, L989-998.  
824 Genova, J.L., and Fehon, R.G. (2003). Neuroglial, Gliotactin, and the Na<sup>+</sup>/K<sup>+</sup> ATPase are  
825 essential for septate junction function in *Drosophila*. *J Cell Biol* 161, 979-989.  
826 Granderath, S., Stollewerk, A., Greig, S., Goodman, C.S., O'Kane, C.J., and Klambt, C. (1999). *loco*  
827 *encodes an RGS protein required for Drosophila glial differentiation. Development* 126, 1781-  
828 1791.  
829 Guan, Z., Buhl, L.K., Quinn, W.G., and Littleton, J.T. (2011). Altered gene regulation and synaptic  
830 morphology in *Drosophila* learning and memory mutants. *Learning & memory* 18, 191-206.  
831 Halter, D.A., Urban, J., Rickert, C., Ner, S.S., Ito, K., Travers, A.A., and Technau, G.M. (1995). The  
832 Homeobox Gene Repo Is Required for the Differentiation and Maintenance of Glia Function in  
833 the Embryonic Nervous-System of *Drosophila-Melanogaster*. *Development* 121, 317-332.  
834 Hartenstein, V. (2011). Morphological diversity and development of glia in *Drosophila*. *Glia* 59,  
835 1237-1252.  
836 Hijazi, A., Haenlin, M., Waltzer, L., and Roch, F. (2011). The Ly6 protein coiled is required for  
837 septate junction and blood brain barrier organisation in *Drosophila*. *PLoS One* 6, e17763.  
838 Hijazi, A., Masson, W., Auge, B., Waltzer, L., Haenlin, M., and Roch, F. (2009). *boudin* is required  
839 for septate junction organisation in *Drosophila* and codes for a diffusible protein of the Ly6  
840 superfamily. *Development* 136, 2199-2209.  
841 Hindle, S.J., and Bainton, R.J. (2014). Barrier mechanisms in the *Drosophila* blood-brain barrier.  
842 *Front Neurosci* 8, 414.  
843 Howe, A.K. (2004). Regulation of actin-based cell migration by cAMP/PKA. *Biochim Biophys Acta*  
844 1692, 159-174.  
845 Ito, K., Urban, J., and Technau, G.M. (1995). Distribution, classification, and development  
846 of *Drosophila* glial cells in the late embryonic and early larval ventral nerve cord. *Roux's Arch*  
847 *Dev Biol* 204, 284-307.  
848 Izumi, Y., and Furuse, M. (2014). Molecular organization and function of invertebrate occluding  
849 junctions. *Semin Cell Dev Biol* 36, 186-193.

850 Jarecki, J., Johnson, E., and Krasnow, M.A. (1999). Oxygen regulation of airway branching in  
851 *Drosophila* is mediated by branchless FGF. *Cell* *99*, 211-220.

852 Kalderon, D., and Rubin, G.M. (1988). Isolation and characterization of *Drosophila* cAMP-  
853 dependent protein kinase genes. *Genes Dev* *2*, 1539-1556.

854 Lane, M.E., and Kalderon, D. (1993). Genetic investigation of cAMP-dependent protein kinase  
855 function in *Drosophila* development. *Genes Dev* *7*, 1229-1243.

856 Lane, M.E., and Kalderon, D. (1994). RNA localization along the anteroposterior axis of the  
857 *Drosophila* oocyte requires PKA-mediated signal transduction to direct normal microtubule  
858 organization. *Genes Dev* *8*, 2986-2995.

859 Lane, M.E., and Kalderon, D. (1995). Localization and functions of protein kinase A during  
860 *Drosophila* oogenesis. *Mech Dev* *49*, 191-200.

861 Lang, P., Gesbert, F., espine-Carmagnat, M., Stancou, R., Pouchelet, M., and Bertoglio, J. (1996).  
862 Protein kinase A phosphorylation of RhoA mediates the morphological and functional effects of  
863 cyclic AMP in cytotoxic lymphocytes. *EMBO J* *15*, 510-519.

864 Li, D., Liu, Y., Pei, C., Zhang, P., Pan, L., Xiao, J., Meng, S., Yuan, Z., and Bi, X. (2017). miR-285-  
865 Yki/Mask double-negative feedback loop mediates blood-brain barrier integrity in *Drosophila*.  
866 *Proc Natl Acad Sci U S A* *114*, E2365-E2374.

867 Li, W., Ohlmeyer, J.T., Lane, M.E., and Kalderon, D. (1995). Function of protein kinase A in  
868 hedgehog signal transduction and *Drosophila* imaginal disc development. *Cell* *80*, 553-562.

869 Li, W., Tully, T., and Kalderon, D. (1996). Effects of a conditional *Drosophila* PKA mutant on  
870 olfactory learning and memory. *Learning & memory* *2*, 320-333.

871 Lim, C.J., Kain, K.H., Tkachenko, E., Goldfinger, L.E., Gutierrez, E., Allen, M.D., Groisman, A.,  
872 Zhang, J., and Ginsberg, M.H. (2008). Integrin-mediated Protein Kinase A Activation at the  
873 Leading Edge of Migrating Cells. *Molecular Biology of the Cell* *19*, 4930-4941.

874 Llimargas, M., Strigini, M., Katidou, M., Karageos, D., and Casanova, J. (2004). Lachesin is a  
875 component of a septate junction-based mechanism that controls tube size and epithelial  
876 integrity in the *Drosophila* tracheal system. *Development* *131*, 181-190.

877 Machacek, M., Hodgson, L., Welch, C., Elliott, H., Pertz, O., Nalbant, P., Abell, A., Johnson, G.L.,  
878 Hahn, K.M., and Danuser, G. (2009). Coordination of Rho GTPase activities during cell  
879 protrusion. *Nature* *461*, 99-103.

880 Magie, C.R., and Parkhurst, S.M. (2005). Rho1 regulates signaling events required for proper  
881 *Drosophila* embryonic development. *Dev Biol* *278*, 144-154.

882 Marks, S.A., and Kalderon, D. (2011). Regulation of mammalian Gli proteins by Costal 2 and PKA  
883 in *Drosophila* reveals Hedgehog pathway conservation. *Development* *138*, 2533-2542.

884 Mayer, F., Mayer, N., Chinn, L., Pinsonneault, R.L., Kroetz, D., and Bainton, R.J. (2009).  
885 Evolutionary conservation of vertebrate blood-brain barrier chemoprotective mechanisms in  
886 *Drosophila*. *The Journal of neuroscience : the official journal of the Society for Neuroscience* *29*,  
887 3538-3550.

888 Nelson, W.J. (2009). Remodeling epithelial cell organization: transitions between front-rear and  
889 apical-basal polarity. *Cold Spring Harbor perspectives in biology* *1*, a000513.

890 Olofsson, B., and Page, D.T. (2005). Condensation of the central nervous system in embryonic  
891 *Drosophila* is inhibited by blocking hemocyte migration or neural activity. *Dev Biol* *279*, 233-243.

892 Oshima, K., and Fehon, R.G. (2011). Analysis of protein dynamics within the septate junction  
893 reveals a highly stable core protein complex that does not include the basolateral polarity  
894 protein Discs large. *Journal of Cell Science* *124*, 2861-2871.

895 Park, S.K., Sedore, S.A., Cronmiller, C., and Hirsh, J. (2000). Type II cAMP-dependent protein  
896 kinase-deficient *Drosophila* are viable but show developmental, circadian, and drug response  
897 phenotypes. *J Biol Chem* *275*, 20588-20596.

898 Petri, J., Syed, M.H., Rey, S., and Klambt, C. (2019). Non-Cell-Autonomous Function of the GPI-  
899 Anchored Protein Undicht during Septate Junction Assembly. *Cell Rep* *26*, 1641-1653 e1644.

900 Reinhold, A.K., and Rittner, H.L. (2017). Barrier function in the peripheral and central nervous  
901 system-a review. *Pflugers Arch* *469*, 123-134.

902 Renger, J.J., Ueda, A., Atwood, H.L., Govind, C.K., and Wu, C.F. (2000). Role of cAMP cascade in  
903 synaptic stability and plasticity: ultrastructural and physiological analyses of individual synaptic  
904 boutons in *Drosophila* memory mutants. *The Journal of neuroscience : the official journal of the*  
905 *Society for Neuroscience* *20*, 3980-3992.

906 Rogers, S.L., Wiedemann, U., Hacker, U., Turck, C., and Vale, R.D. (2004). *Drosophila* RhoGEF2  
907 associates with microtubule plus ends in an EB1-dependent manner. *Curr Biol* *14*, 1827-1833.

908 Salzer, J.L., Brophy, P.J., and Peles, E. (2008). Molecular domains of myelinated axons in the  
909 peripheral nervous system. *Glia* *56*, 1532-1540.

910 Schindelin, J., Arganda-Carreras, I., Frise, E., Kaynig, V., Longair, M., Pietzsch, T., Preibisch, S.,  
911 Rueden, C., Saalfeld, S., Schmid, B., *et al.* (2012). Fiji: an open-source platform for biological-  
912 image analysis. *Nature methods* *9*, 676-682.

913 Schwabe, T., Bainton, R.J., Fetter, R.D., Heberlein, U., and Gaul, U. (2005). GPCR signaling is  
914 required for blood-brain barrier formation in *Drosophila*. *Cell* *123*, 133-144.

915 Schwabe, T., Li, X., and Gaul, U. (2017). Dynamic analysis of the mesenchymal-epithelial  
916 transition of blood-brain barrier forming glia in *Drosophila*. *Biol Open* *6*, 232-243.

917 Shabb, J.B. (2001). Physiological substrates of cAMP-dependent protein kinase. *Chemical*  
918 *reviews* *101*, 2381-2411.

919 Stork, T., Engelen, D., Krudewig, A., Silies, M., Bainton, R.J., and Klambt, C. (2008). Organization  
920 and function of the blood-brain barrier in *Drosophila*. *The Journal of neuroscience : the official*  
921 *journal of the Society for Neuroscience* *28*, 587-597.

922 Sugimoto, K., Ichikawa-Tomikawa, N., Nishiura, K., Kunii, Y., Sano, Y., Shimizu, F., Kakita, A.,  
923 Kanda, T., Imura, T., and Chiba, H. (2020). Serotonin/5-HT1A Signaling in the Neurovascular Unit  
924 Regulates Endothelial CLDN5 Expression. *Int J Mol Sci* *22*.

925 Suloway, C., Pulokas, J., Fellmann, D., Cheng, A., Guerra, F., Quispe, J., Stagg, S., Potter, C.S., and  
926 Carragher, B. (2005). Automated molecular microscopy: the new Leginon system. *Journal of*  
927 *structural biology* *151*, 41-60.

928 Syed, M.H., Krudewig, A., Engelen, D., Stork, T., and Klambt, C. (2011). The CD59 family member  
929 Leaky/Coiled is required for the establishment of the blood-brain barrier in *Drosophila*. *The*  
930 *Journal of neuroscience : the official journal of the Society for Neuroscience* *31*, 7876-7885.

931 Tang, S.-t., Tang, H.-q., Su, H., Wang, Y., Zhou, Q., Zhang, Q., Wang, Y., and Zhu, H.-q. (2019).  
932 Glucagon-like peptide-1 attenuates endothelial barrier injury in diabetes via cAMP/PKA  
933 mediated down-regulation of MLC phosphorylation. *Biomedicine & Pharmacotherapy* *113*,  
934 108667.

935 Taylor, S.S., Buechler, J.A., and Yonemoto, W. (1990). cAMP-dependent protein kinase:  
936 framework for a diverse family of regulatory enzymes. *Annual review of biochemistry* 59, 971-  
937 1005.

938 Tempesta, C., Hijazi, A., Moussian, B., and Roch, F. (2017). Boudin trafficking reveals the  
939 dynamic internalisation of specific septate junction components in *Drosophila*. *PLoS One* 12,  
940 e0185897.

941 Tepass, U. (2012). The apical polarity protein network in *Drosophila* epithelial cells: regulation  
942 of polarity, junctions, morphogenesis, cell growth, and survival. *Annual review of cell and*  
943 *developmental biology* 28, 655-685.

944 Tepass, U., and Hartenstein, V. (1994). The development of cellular junctions in the *Drosophila*  
945 embryo. *Dev Biol* 161, 563-596.

946 Tepass, U., Tanentzapf, G., Ward, R., and Fehon, R. (2001). Epithelial cell polarity and cell  
947 junctions in *Drosophila*. *Annual review of genetics* 35, 747-784.

948 Tkachenko, E., Sabouri-Ghomi, M., Pertz, O., Kim, C., Gutierrez, E., Machacek, M., Groisman, A.,  
949 Danuser, G., and Ginsberg, M.H. (2011). Protein kinase A governs a RhoA-RhoGDI protrusion-  
950 retraction pacemaker in migrating cells. *Nat Cell Biol* 13, 660-667.

951 Unhavaithaya, Y., and Orr-Weaver, T.L. (2012). Polyploidization of glia in neural development  
952 links tissue growth to blood-brain barrier integrity. *Genes Dev* 26, 31-36.

953 Vasin, A., Zueva, L., Torrez, C., Volfson, D., Troy Littleton, J., and Bykhovskaia, M. (2014).  
954 Synapsin regulates activity-dependent outgrowth of synaptic boutons at the *Drosophila*  
955 neuromuscular junction. *Journal of Neuroscience* 34, 10554-10563.

956 Verin, A.D., Gilbert-McClain, L.I., Patterson, C.E., and Garcia, J.G.N. (1998). Biochemical  
957 Regulation of the Nonmuscle Myosin Light Chain Kinase Isoform in Bovine Endothelium.  
958 *American Journal of Respiratory Cell and Molecular Biology* 19, 767-776.

959 Von Stetina, J.R., Frawley, L.E., Unhavaithaya, Y., and Orr-Weaver, T.L. (2018). Variant cell cycles  
960 regulated by Notch signaling control cell size and ensure a functional blood-brain barrier.  
961 *Development* 145.

962 Walker, J.A., Gouzi, J.Y., Long, J.B., Huang, S., Maher, R.C., Xia, H., Khalil, K., Ray, A., Van Vactor,  
963 D., Bernards, R., *et al.* (2013). Genetic and functional studies implicate synaptic overgrowth and  
964 ring gland cAMP/PKA signaling defects in the *Drosophila melanogaster* neurofibromatosis-1  
965 growth deficiency. *PLoS genetics* 9, e1003958.

966 Wojtal, K.A., Hoekstra, D., and van Ijzendoorn, S.C. (2008). cAMP-dependent protein kinase A  
967 and the dynamics of epithelial cell surface domains: moving membranes to keep in shape.  
968 *BioEssays : news and reviews in molecular, cellular and developmental biology* 30, 146-155.

969 Wu, V.M., Schulte, J., Hirschi, A., Tepass, U., and Beitel, G.J. (2004). Sinuous is a *Drosophila*  
970 claudin required for septate junction organization and epithelial tube size control. *J Cell Biol* 164,  
971 313-323.

972 Xu, N., and Myat, M.M. (2012). Coordinated control of lumen size and collective migration in  
973 the salivary gland. *Fly* 6, 142-146.

974 Yi, P., Johnson, A.N., Han, Z., Wu, J., and Olson, E.N. (2008). Heterotrimeric G proteins regulate  
975 a noncanonical function of septate junction proteins to maintain cardiac integrity in *Drosophila*.  
976 *Dev Cell* 15, 704-713.

977 Zhang, J., Schulze, K.L., Hiesinger, P.R., Suyama, K., Wang, S., Fish, M., Acar, M., Hoskins, R.A.,  
978 Bellen, H.J., and Scott, M.P. (2007). Thirty-one flavors of *Drosophila* rab proteins. *Genetics* *176*,  
979 1307-1322.  
980 Zhou, Q., Apionishev, S., and Kalderon, D. (2006). The contributions of protein kinase A and  
981 smoothed phosphorylation to hedgehog signal transduction in *Drosophila melanogaster*.  
982 *Genetics* *173*, 2049-2062.  
983



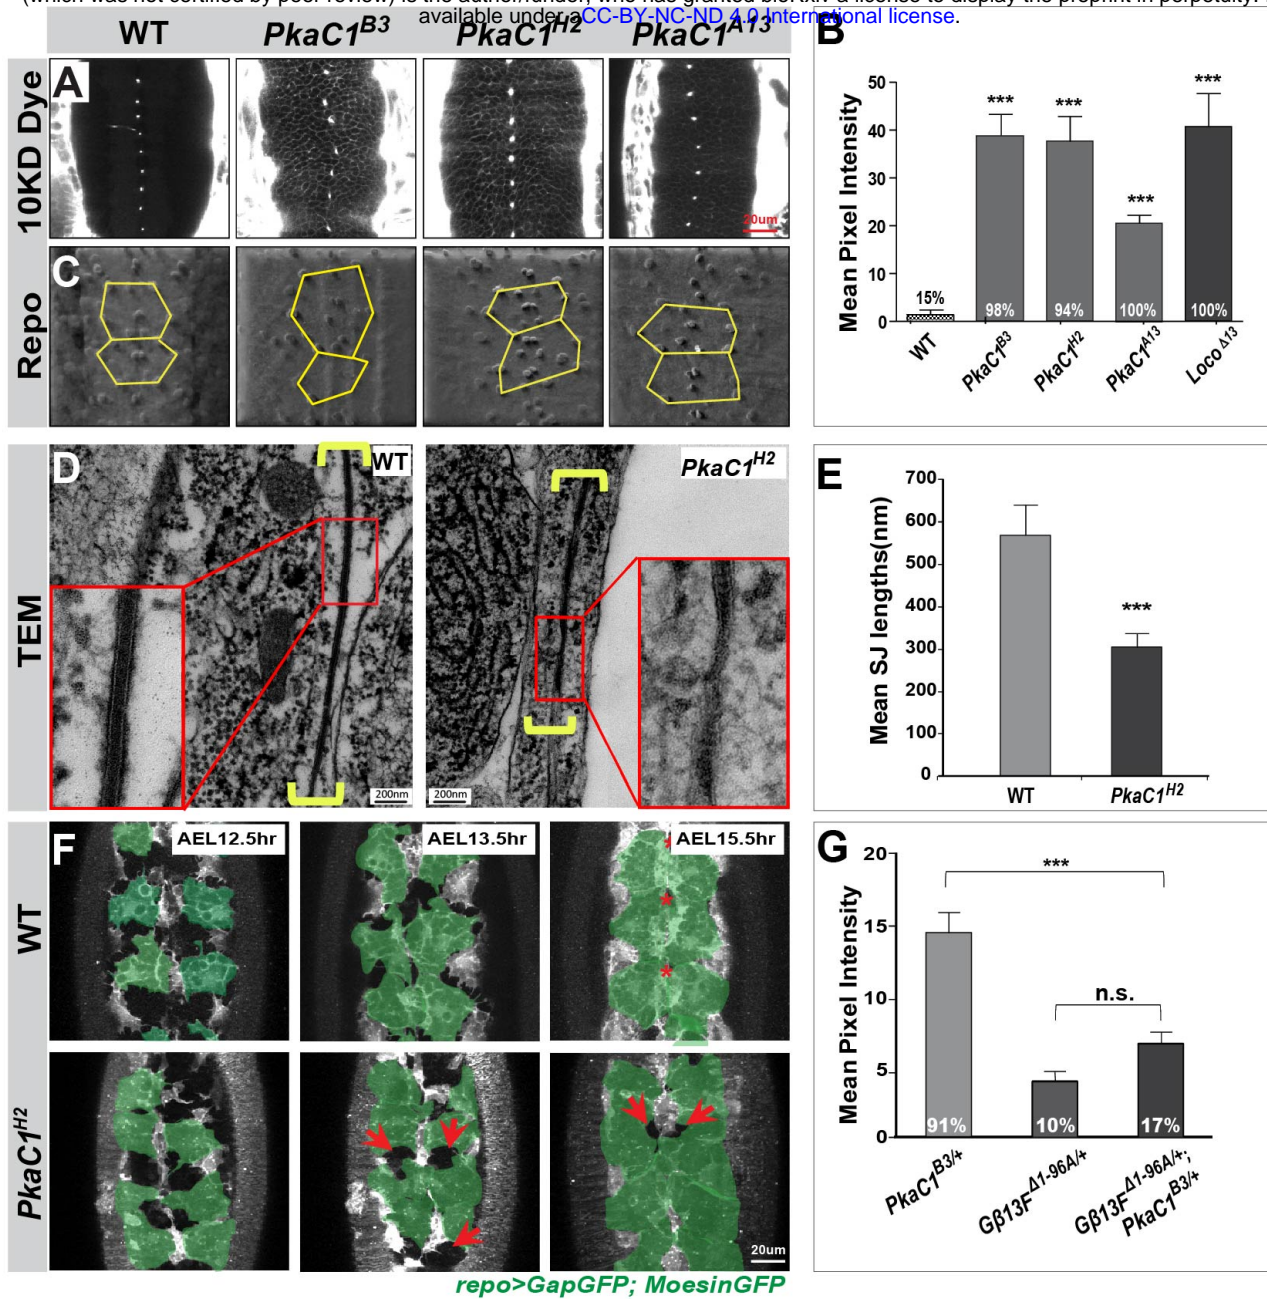

Figure 1.

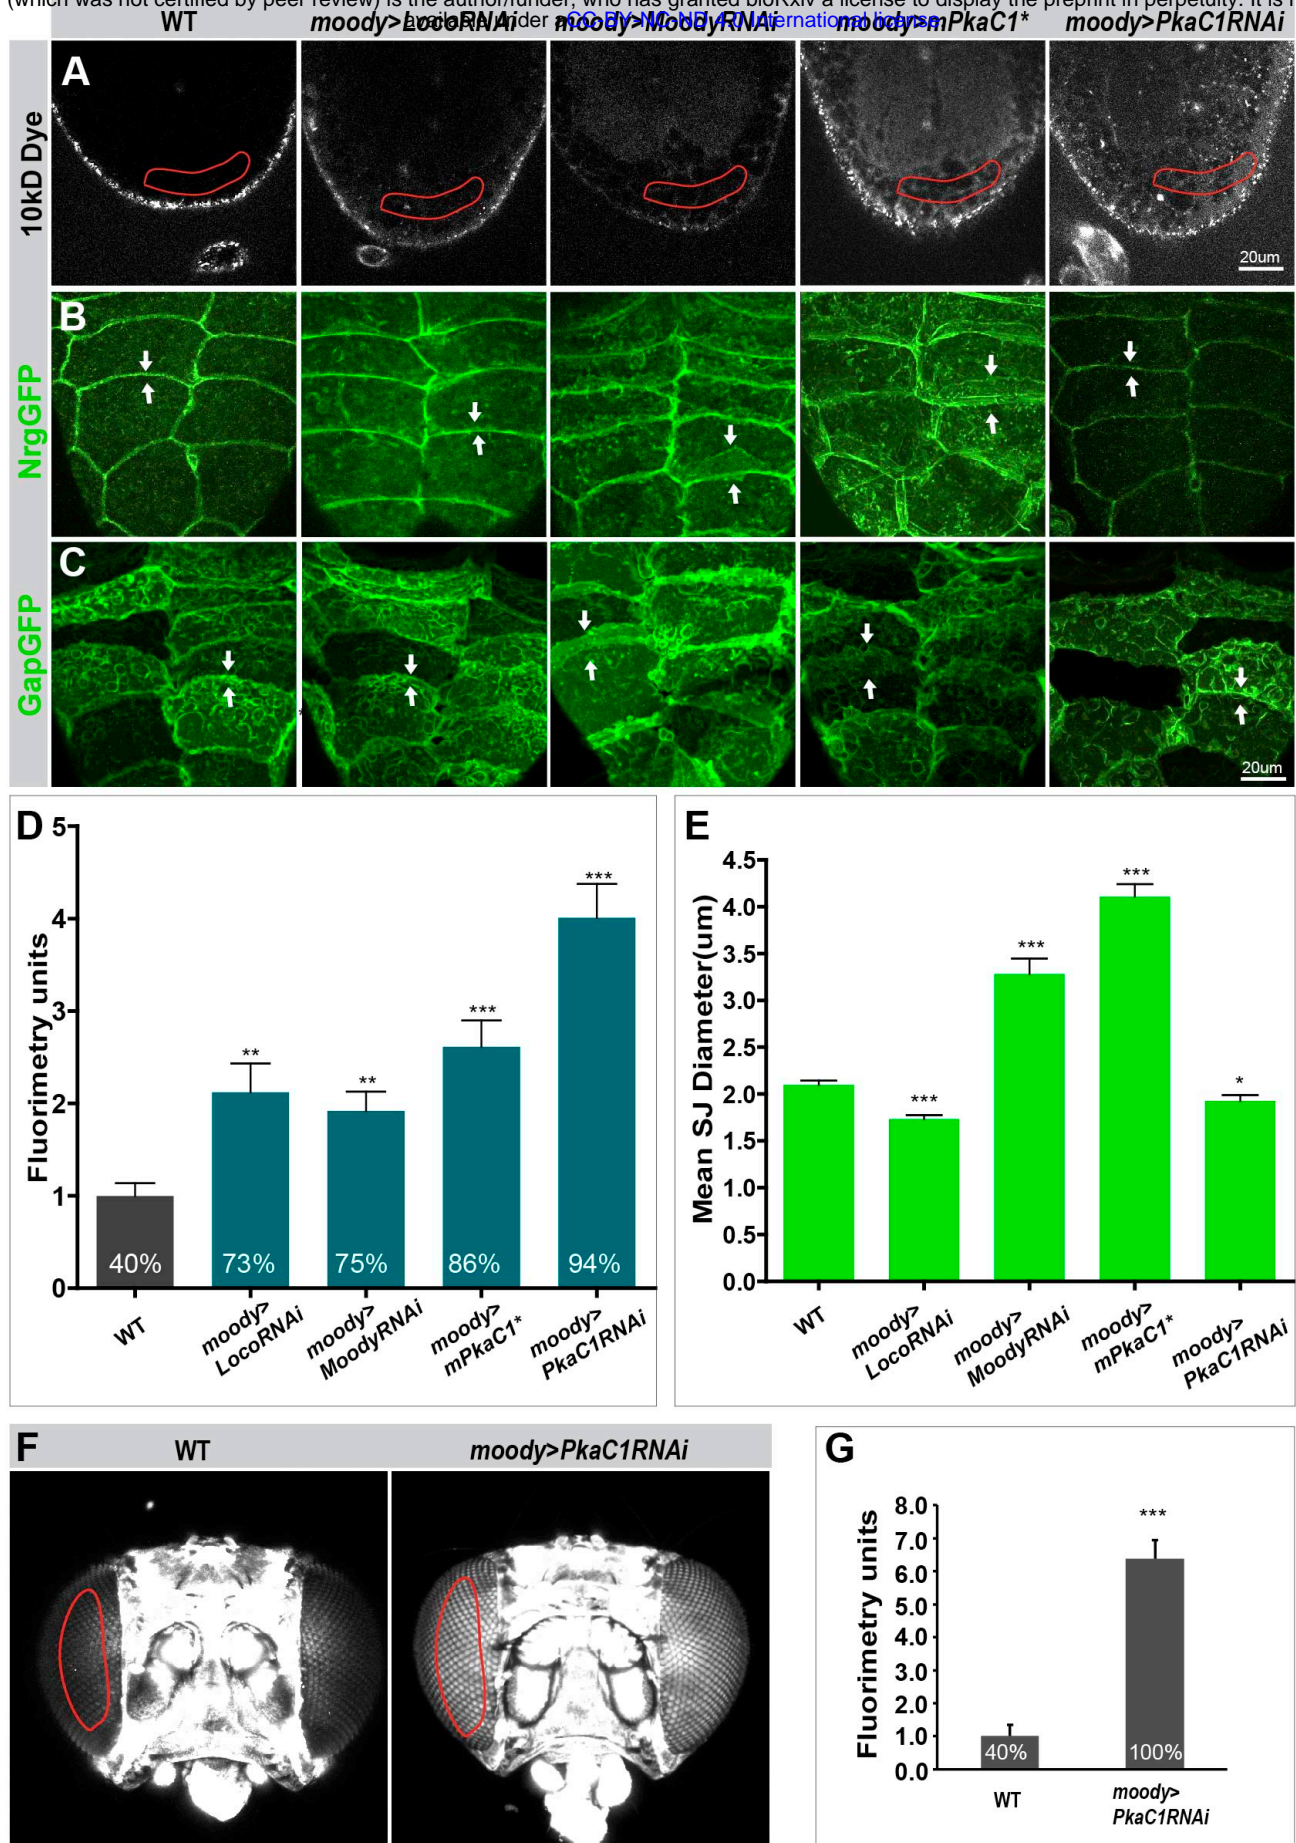

Figure 2.



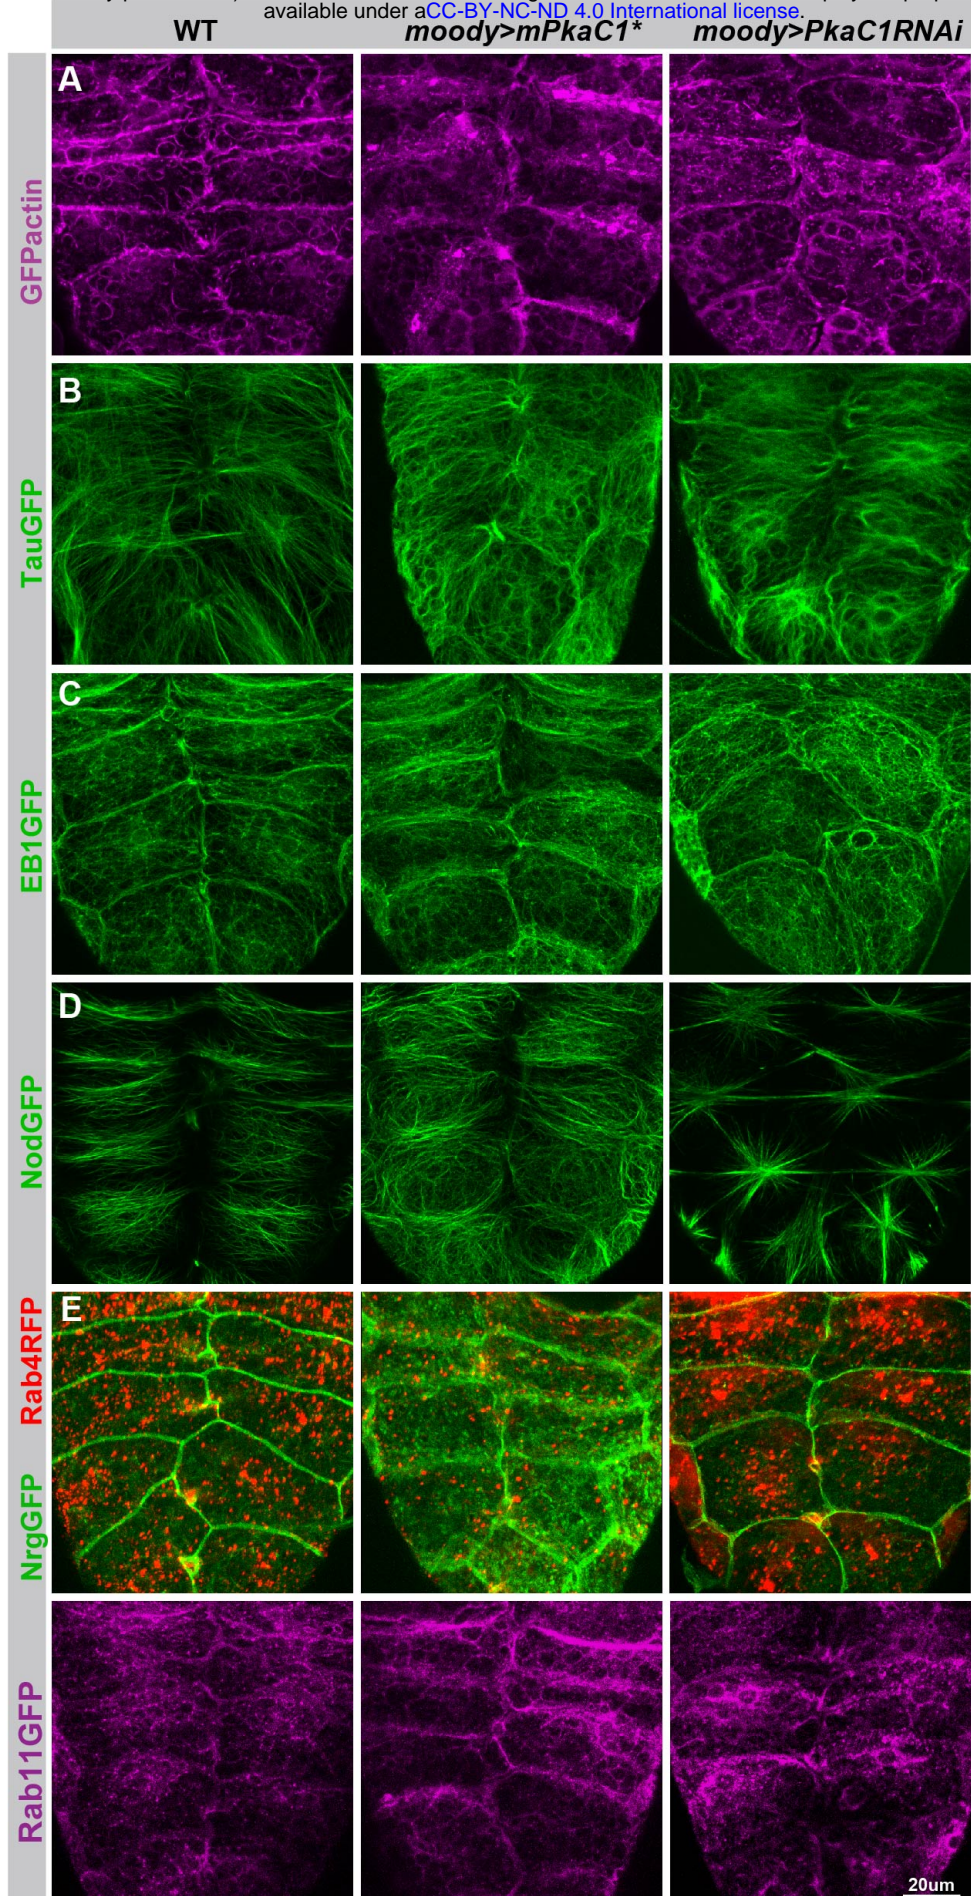

Figure 3.



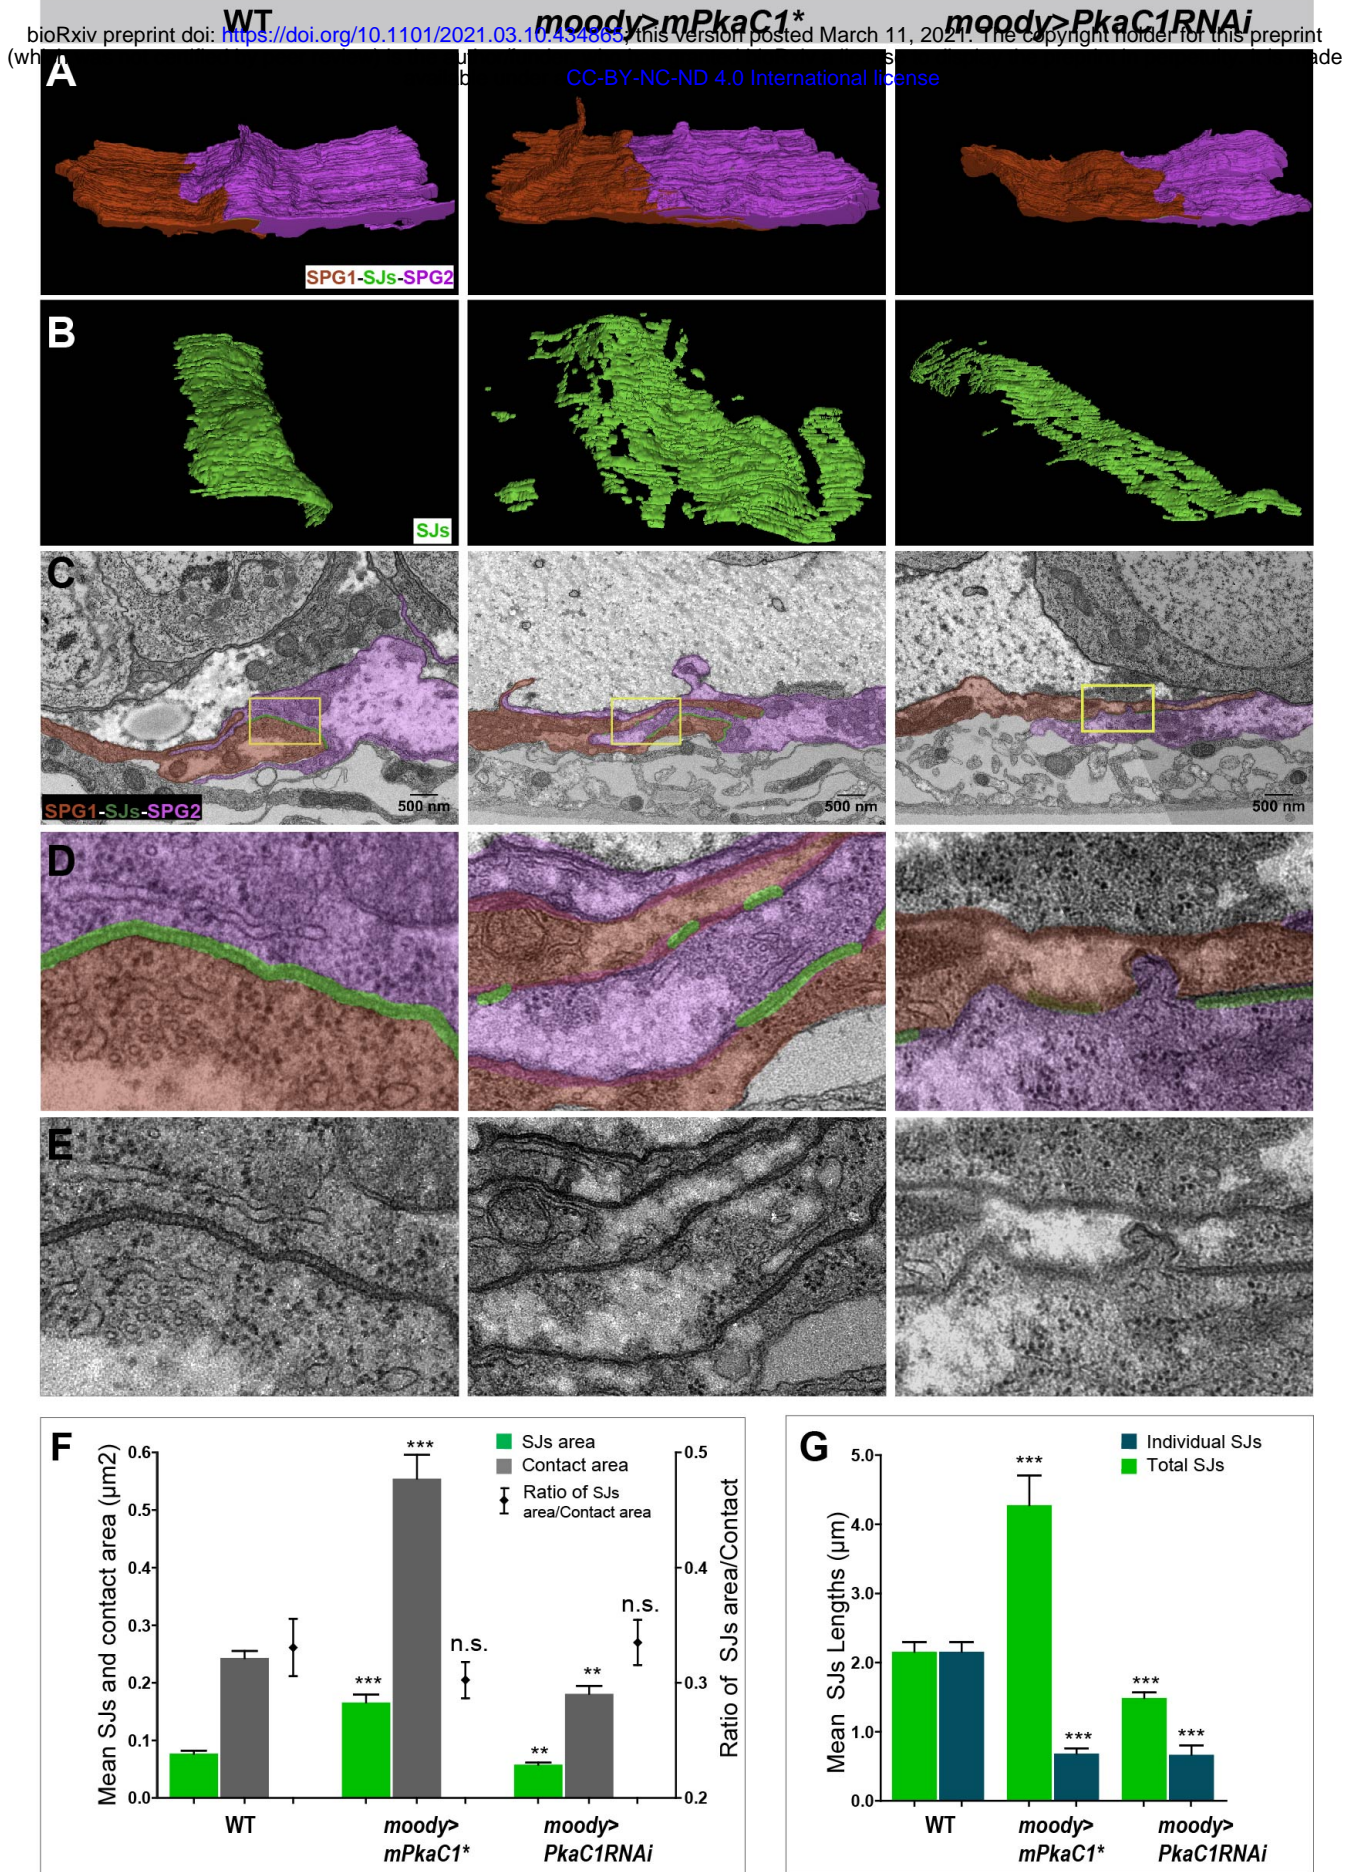

Figure 4.

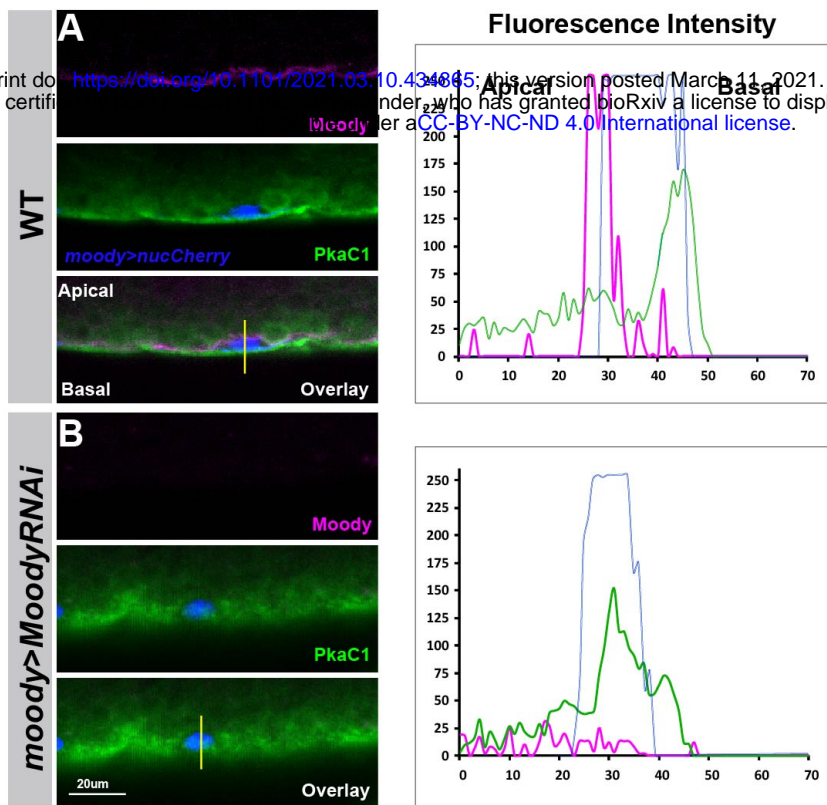

Figure 5.



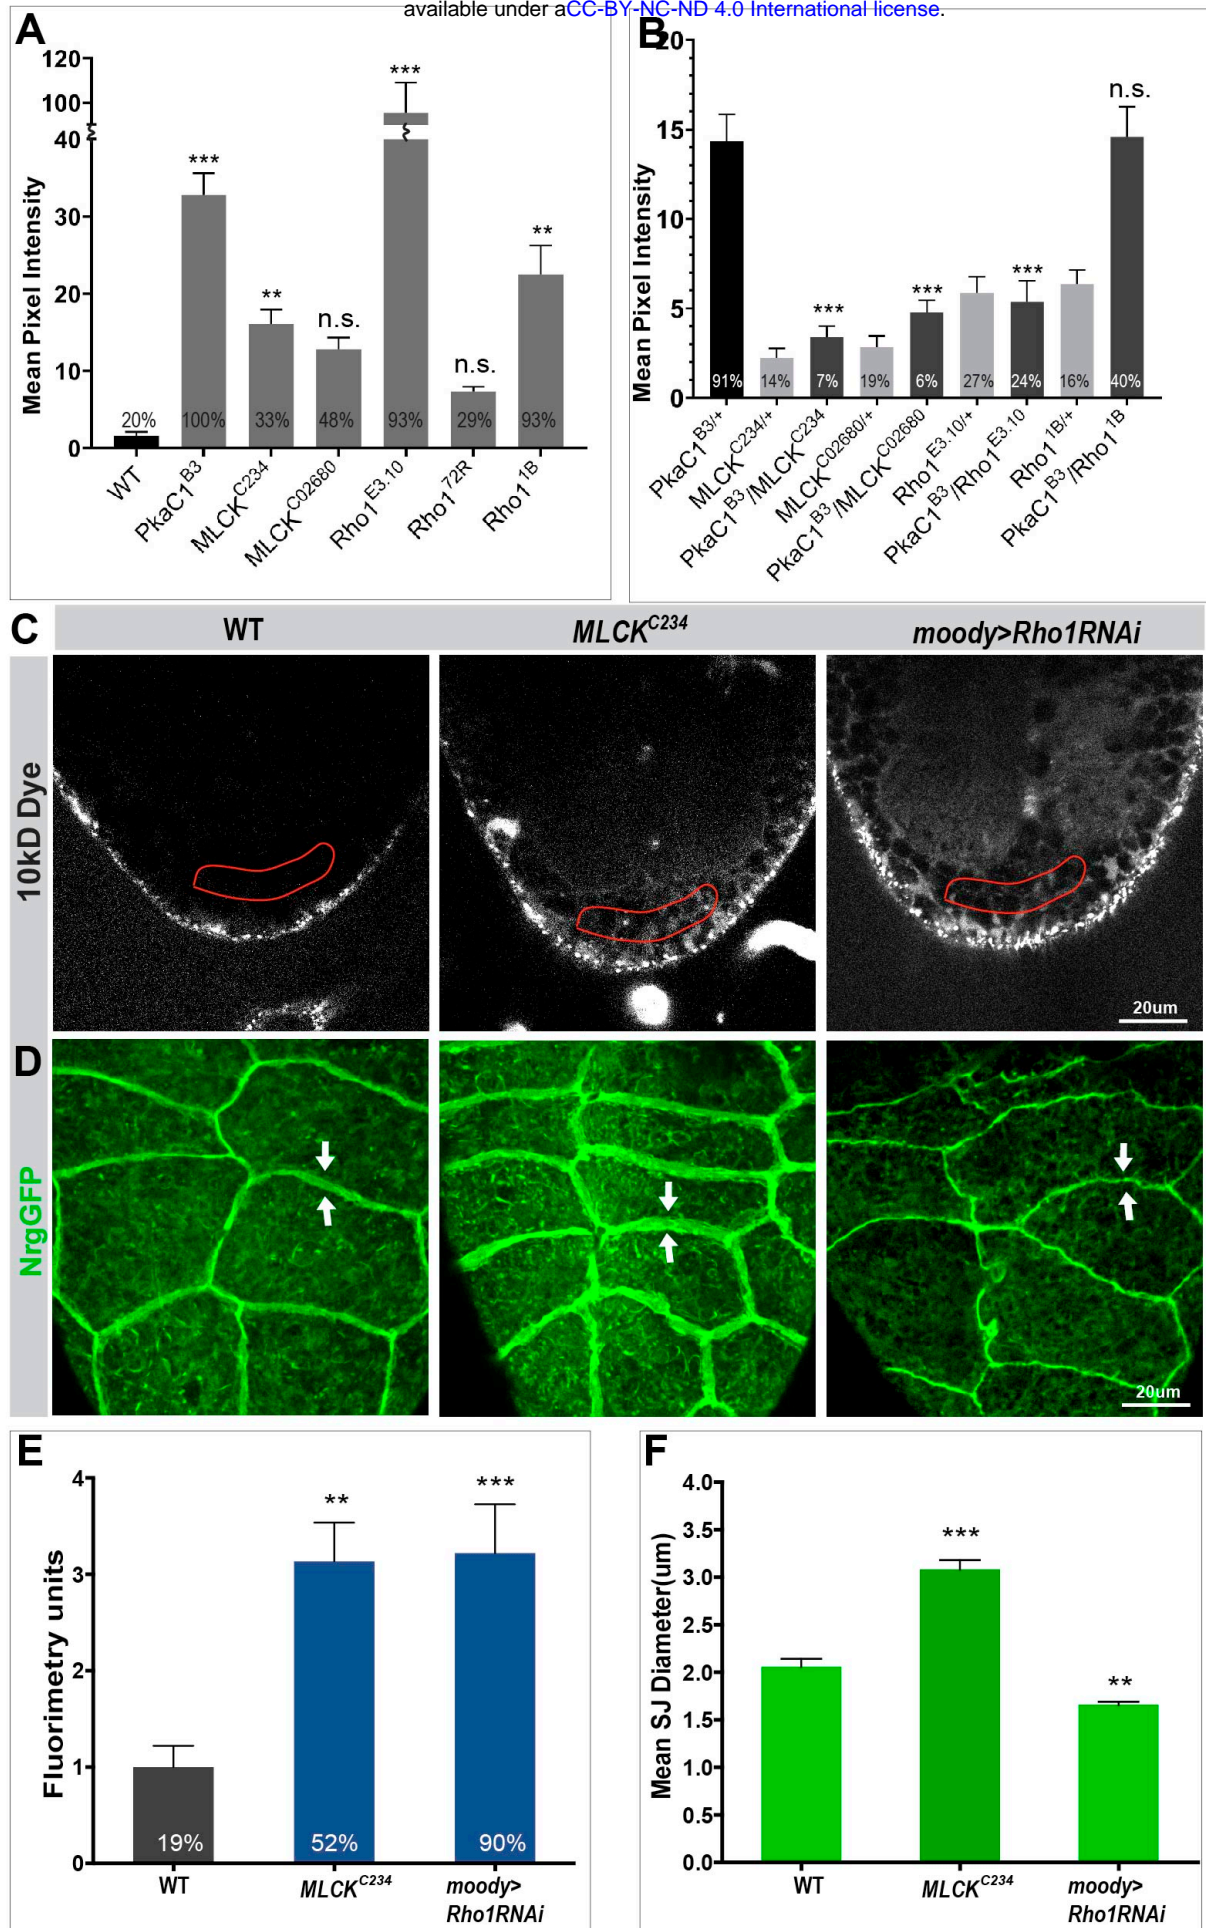

Figure 6.

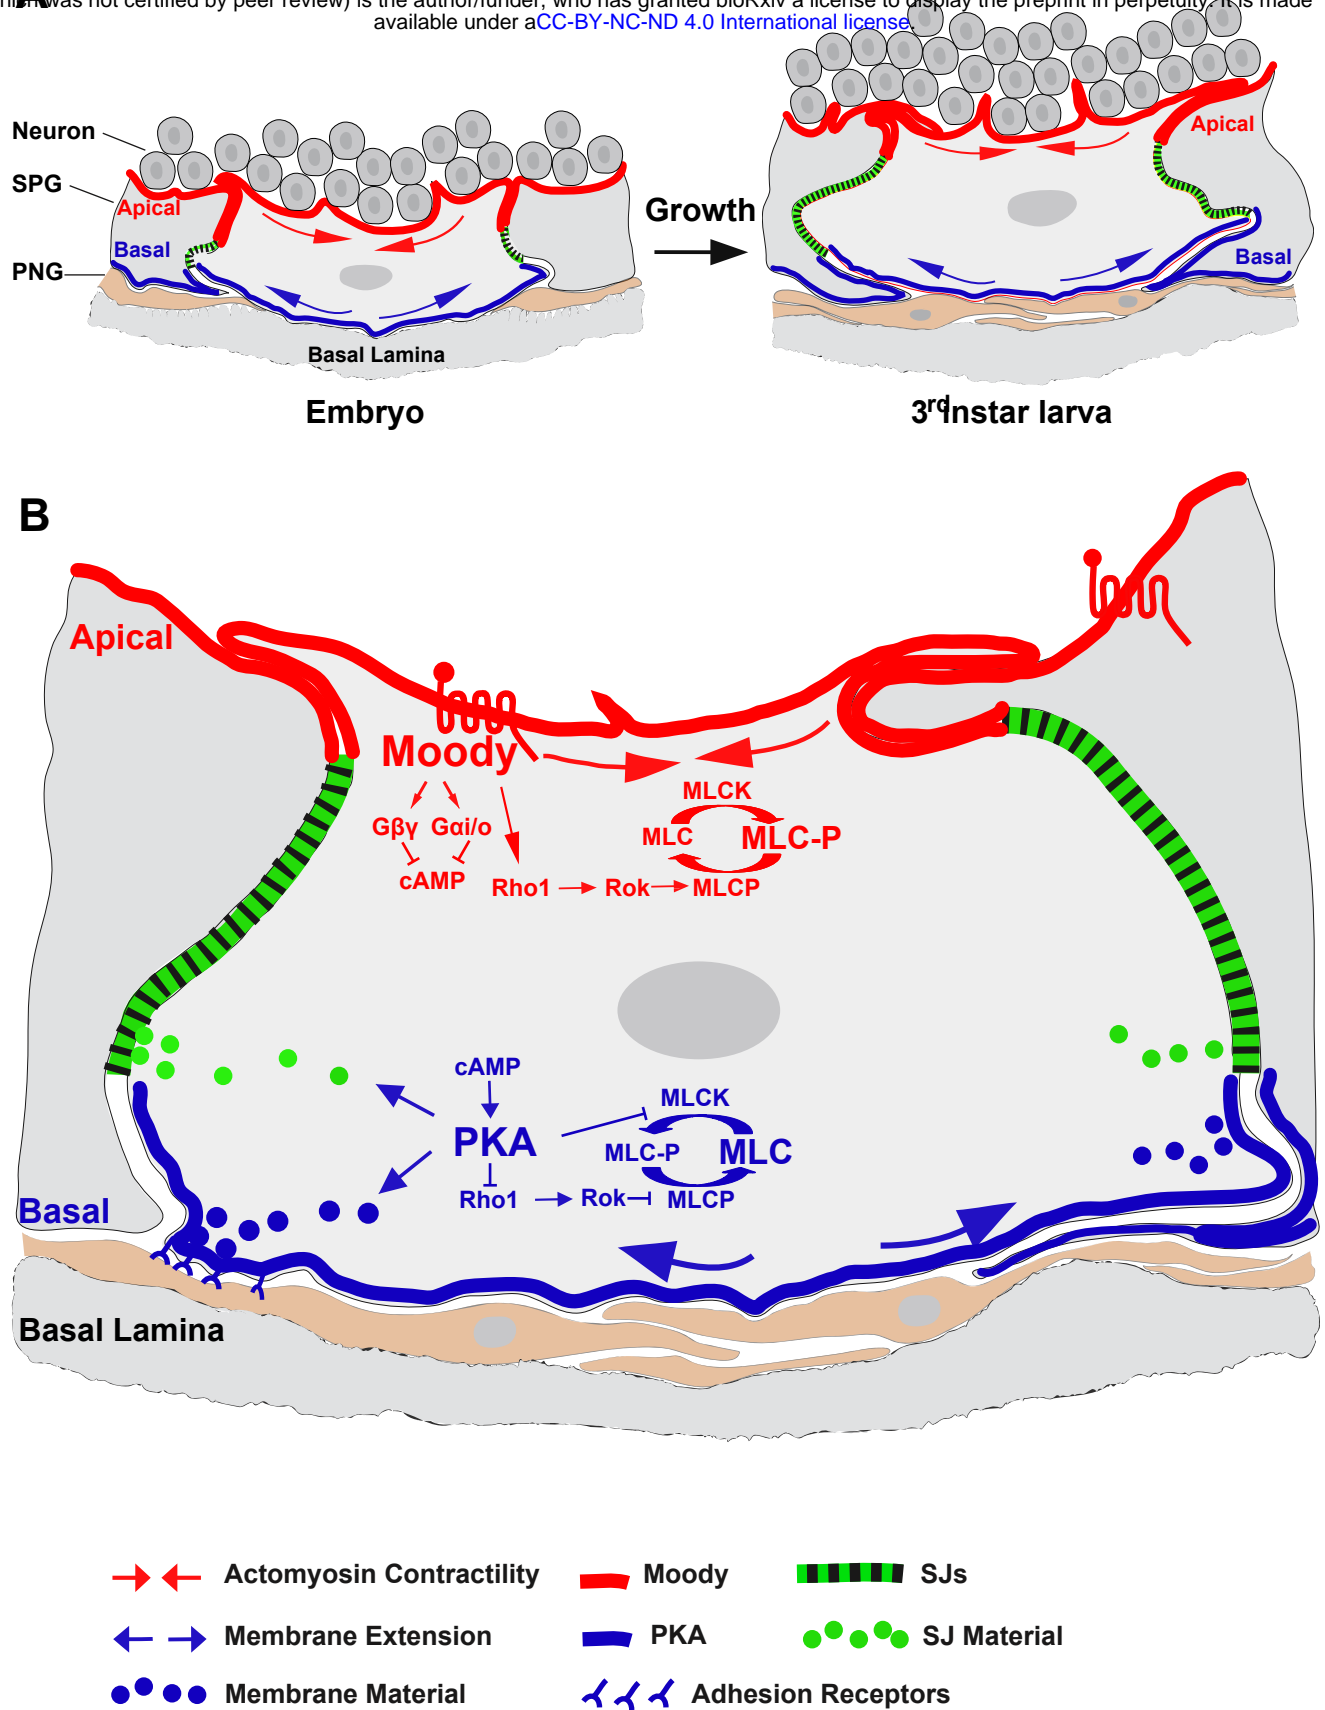

Figure 7.
